# Supplementary material for: Conserved age‐related increases in hippocampal PDE11A4 cause unexpected proteinopathies and cognitive decline of social associative memories
Source: PubMed Central journal article supplement (PMC9577960; doi:10.1111/acel.13687), 2022-09-08

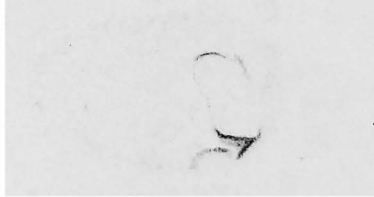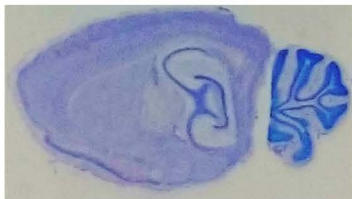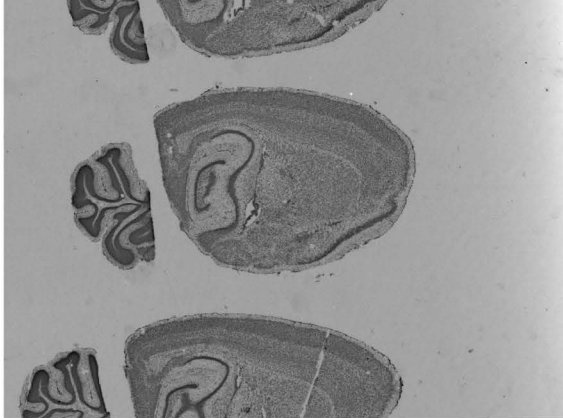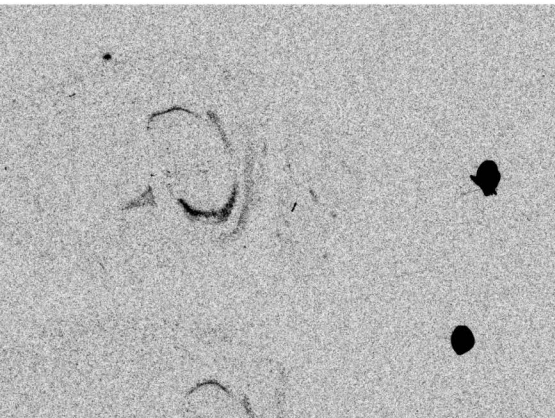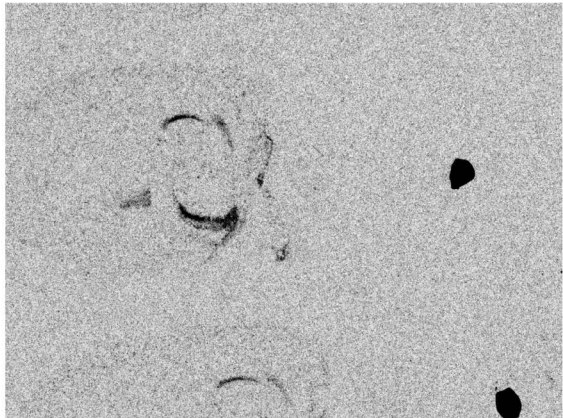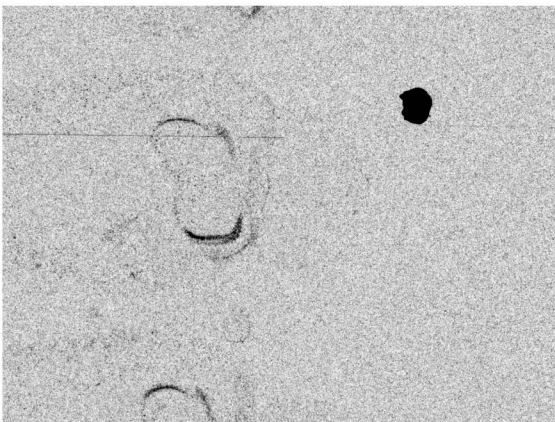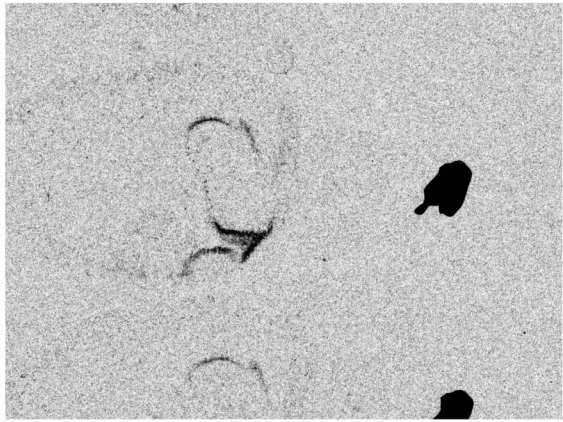

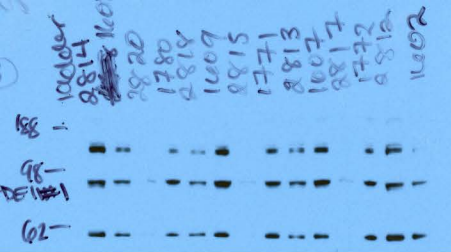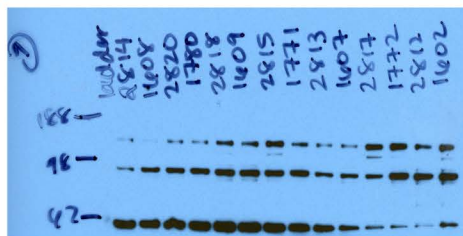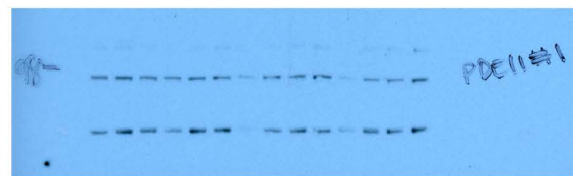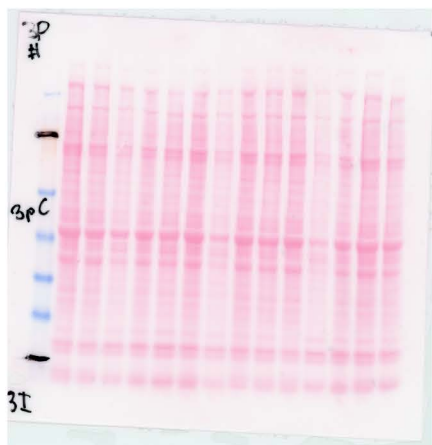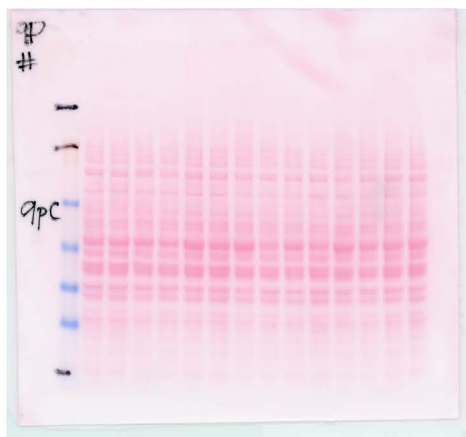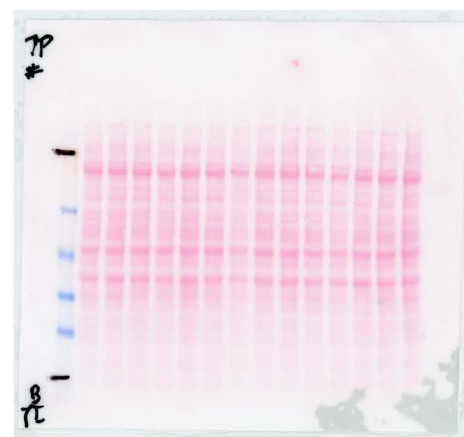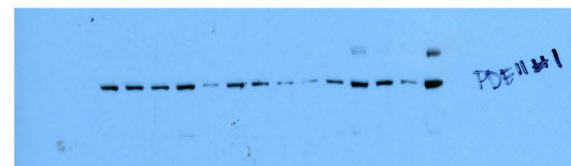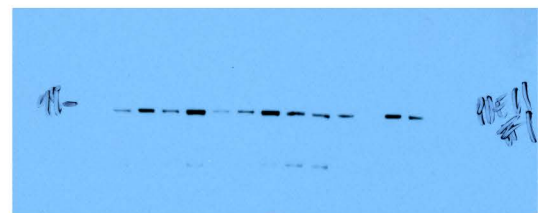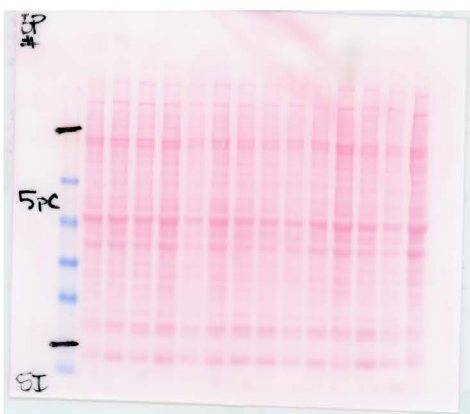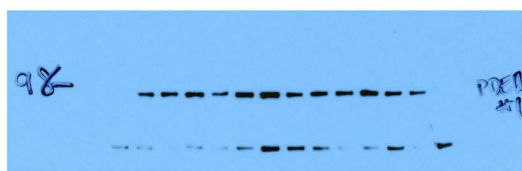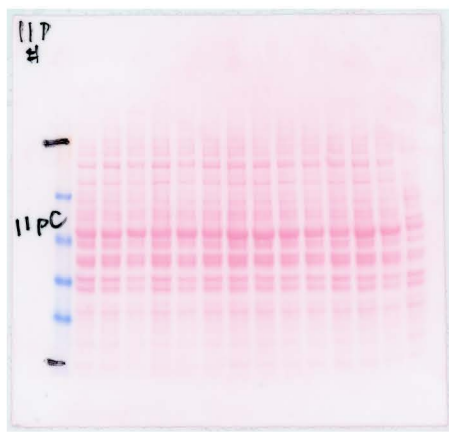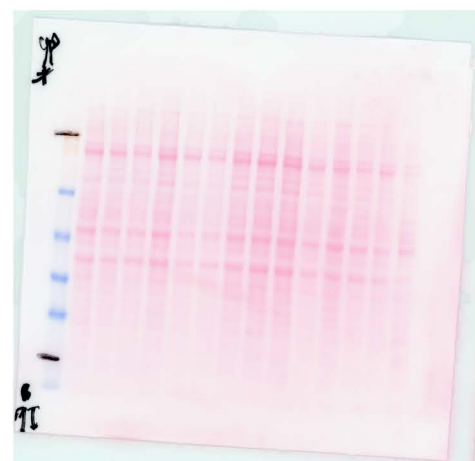



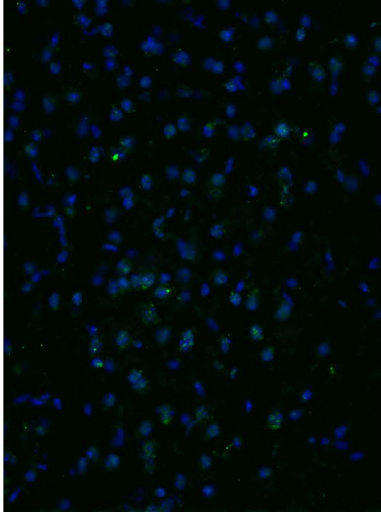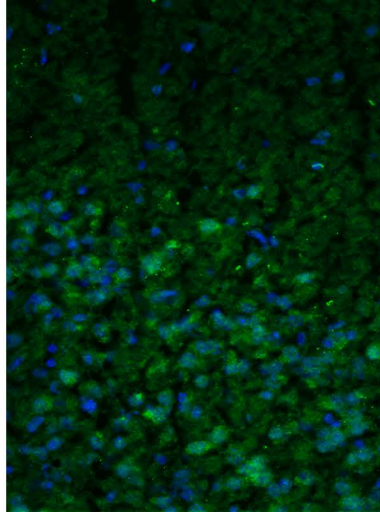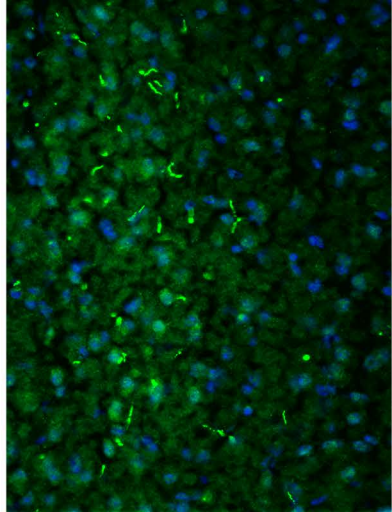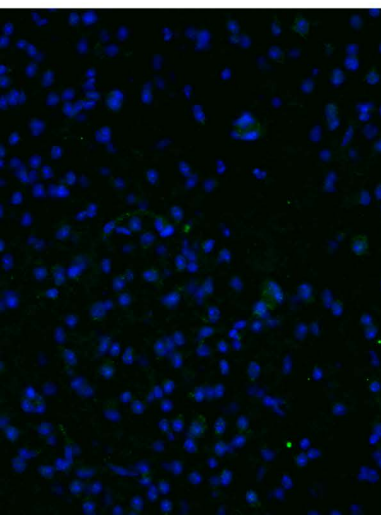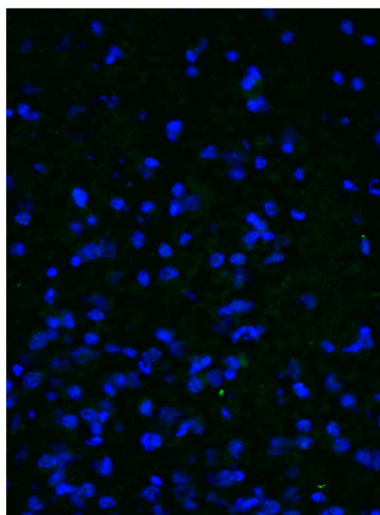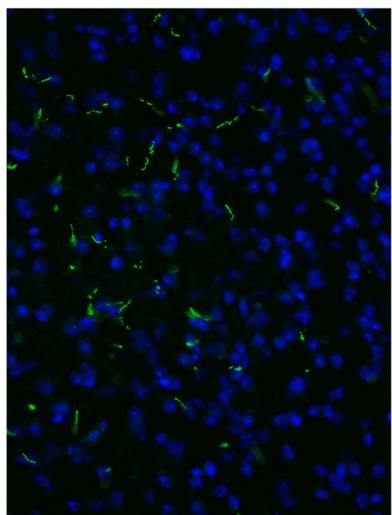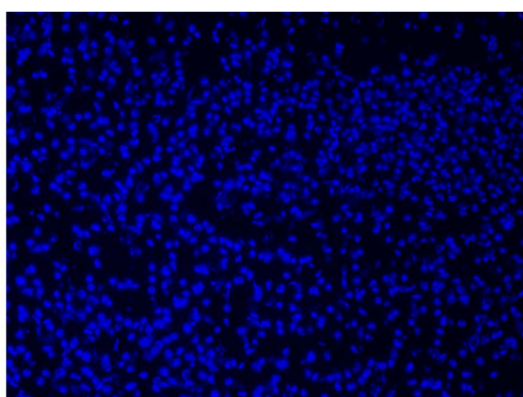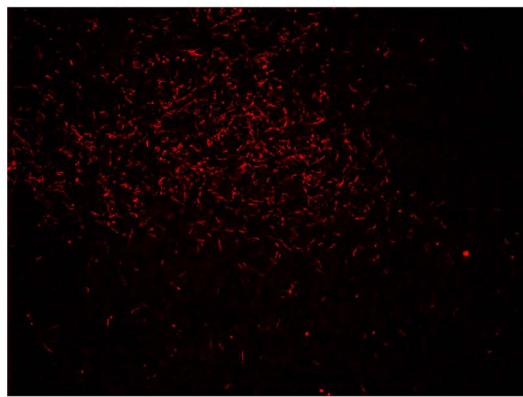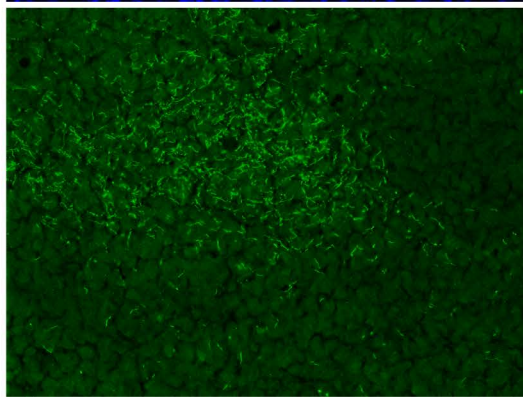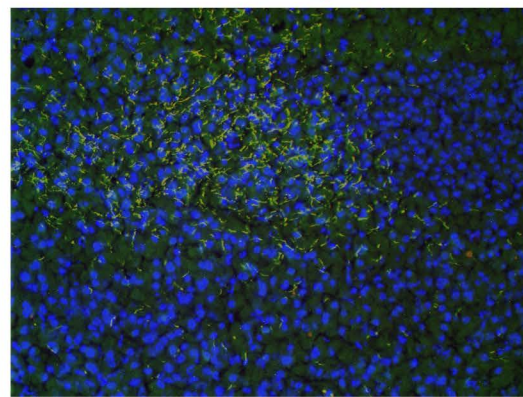



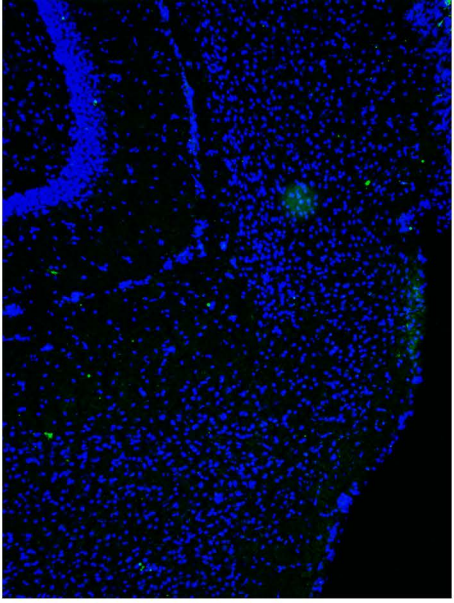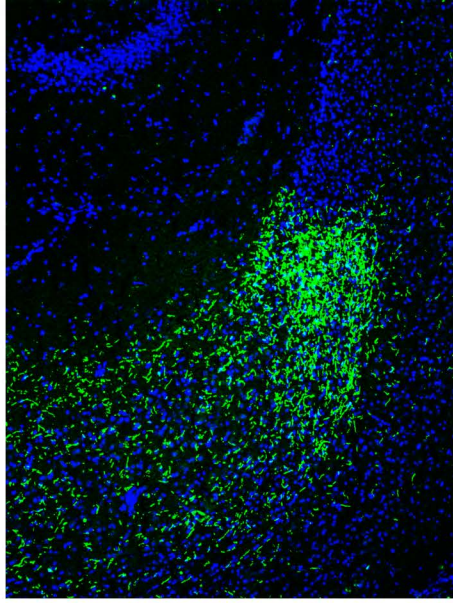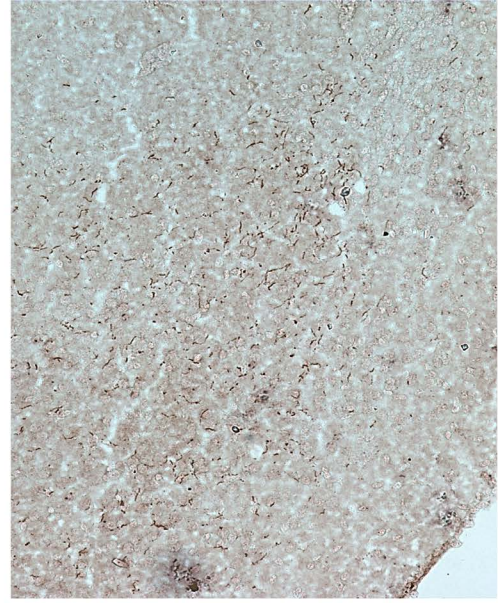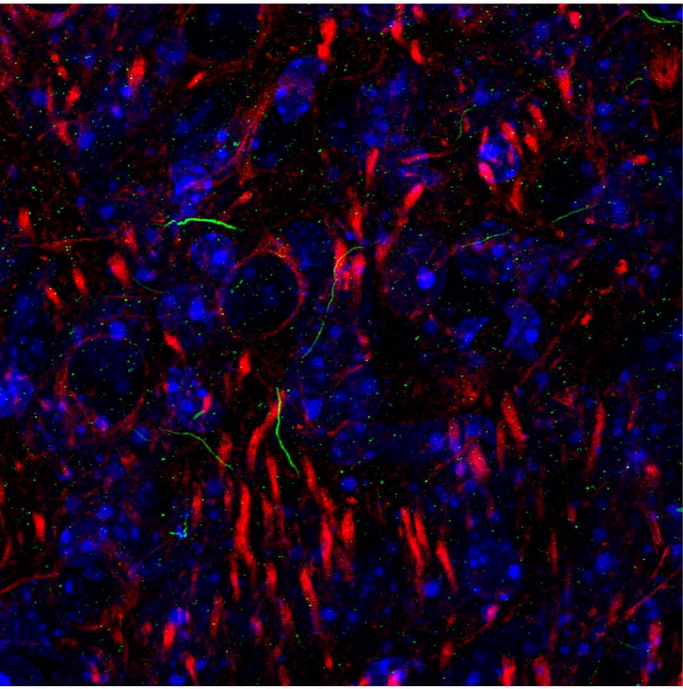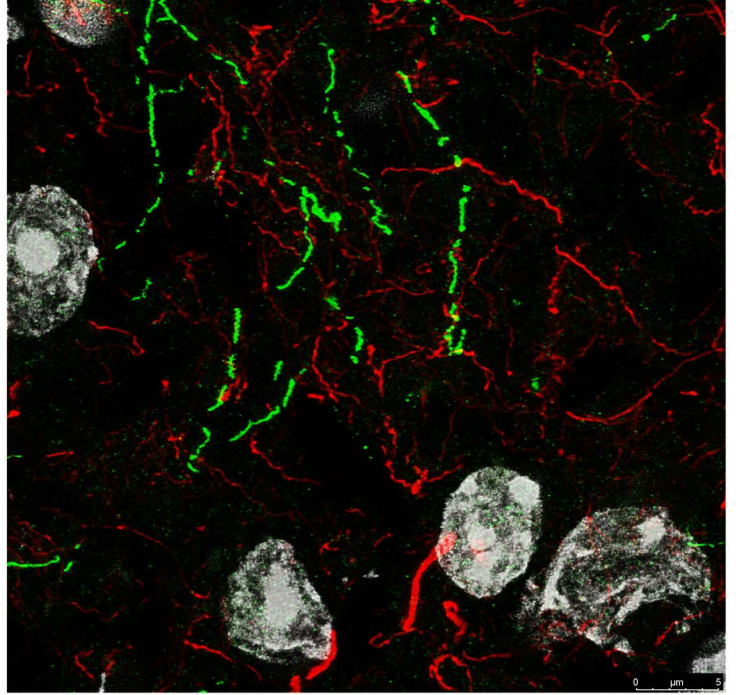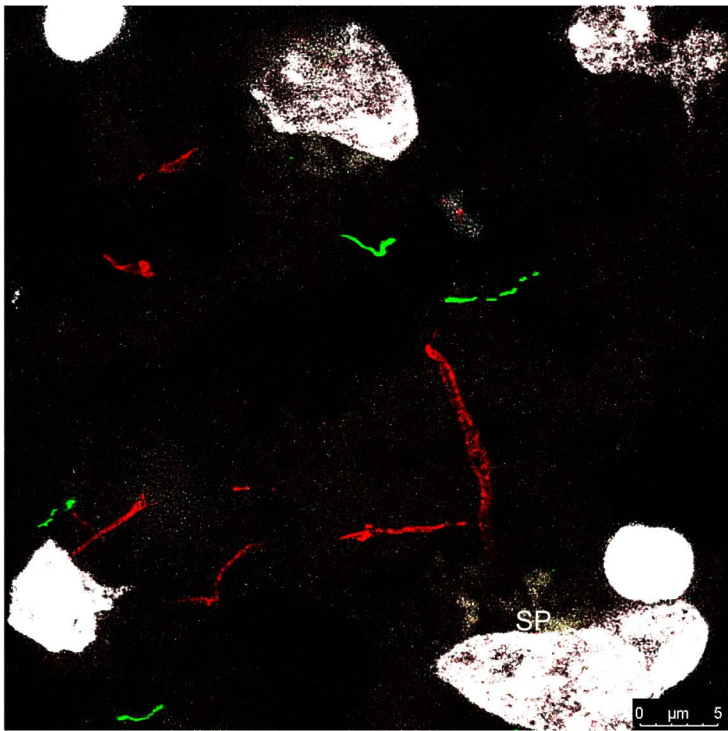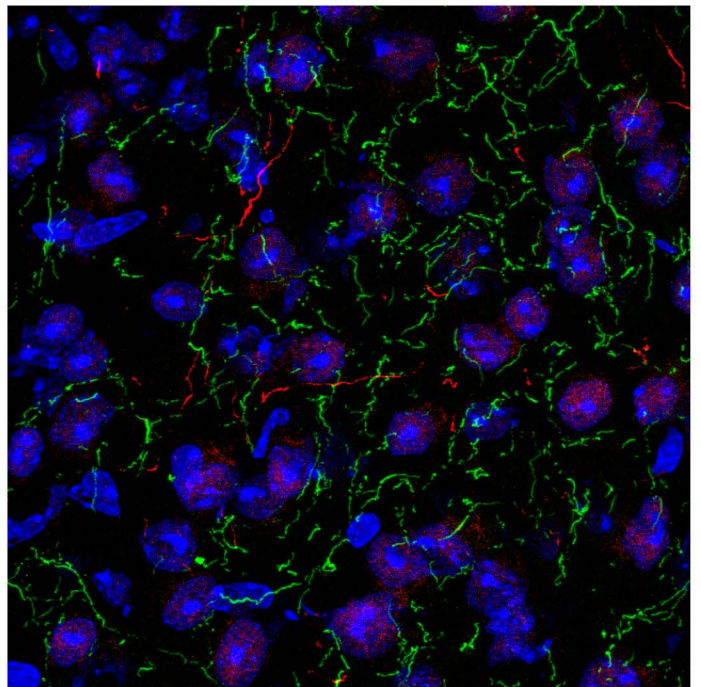



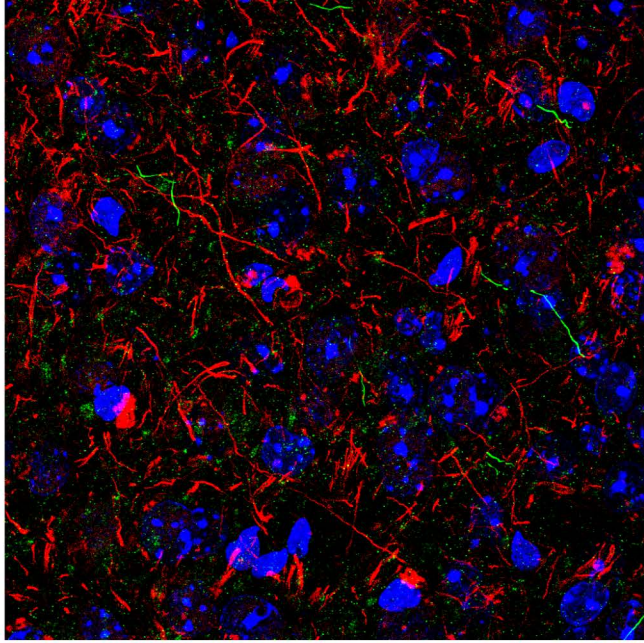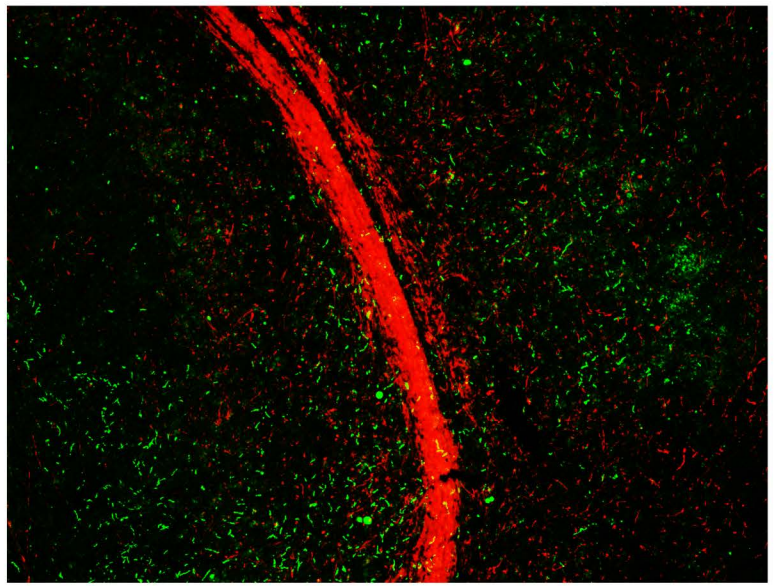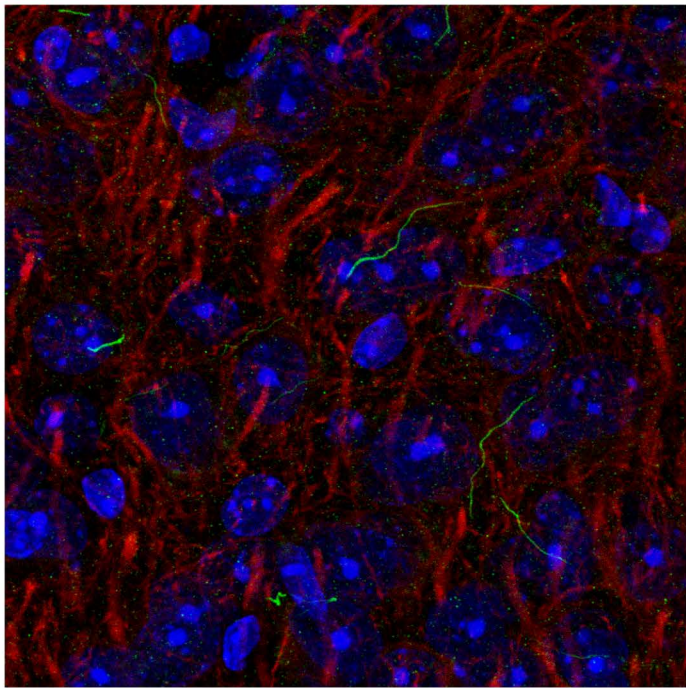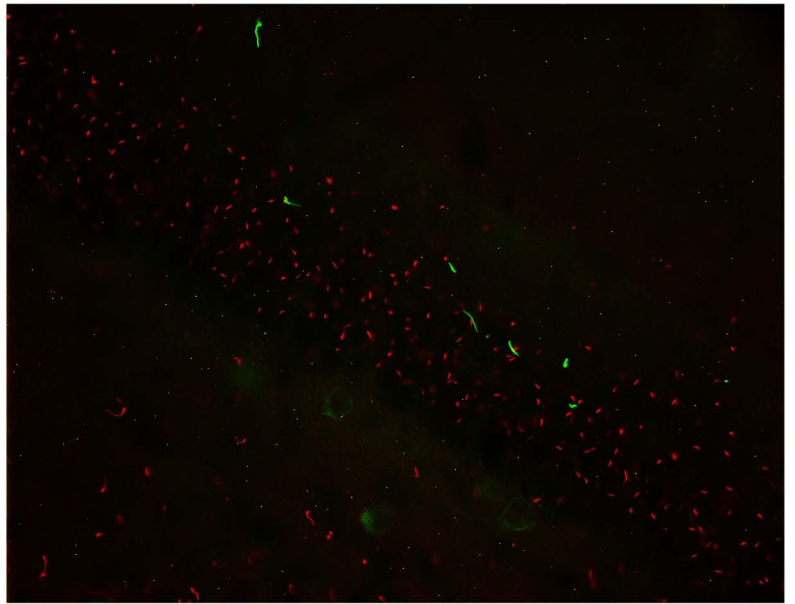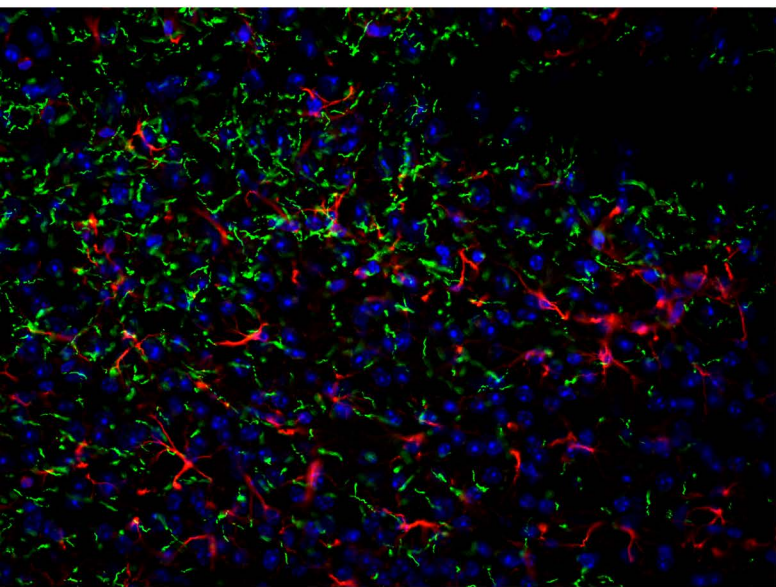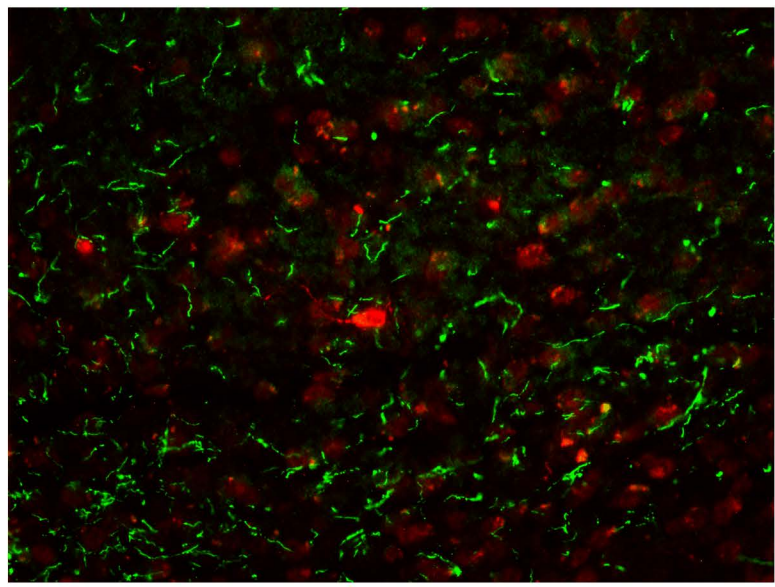



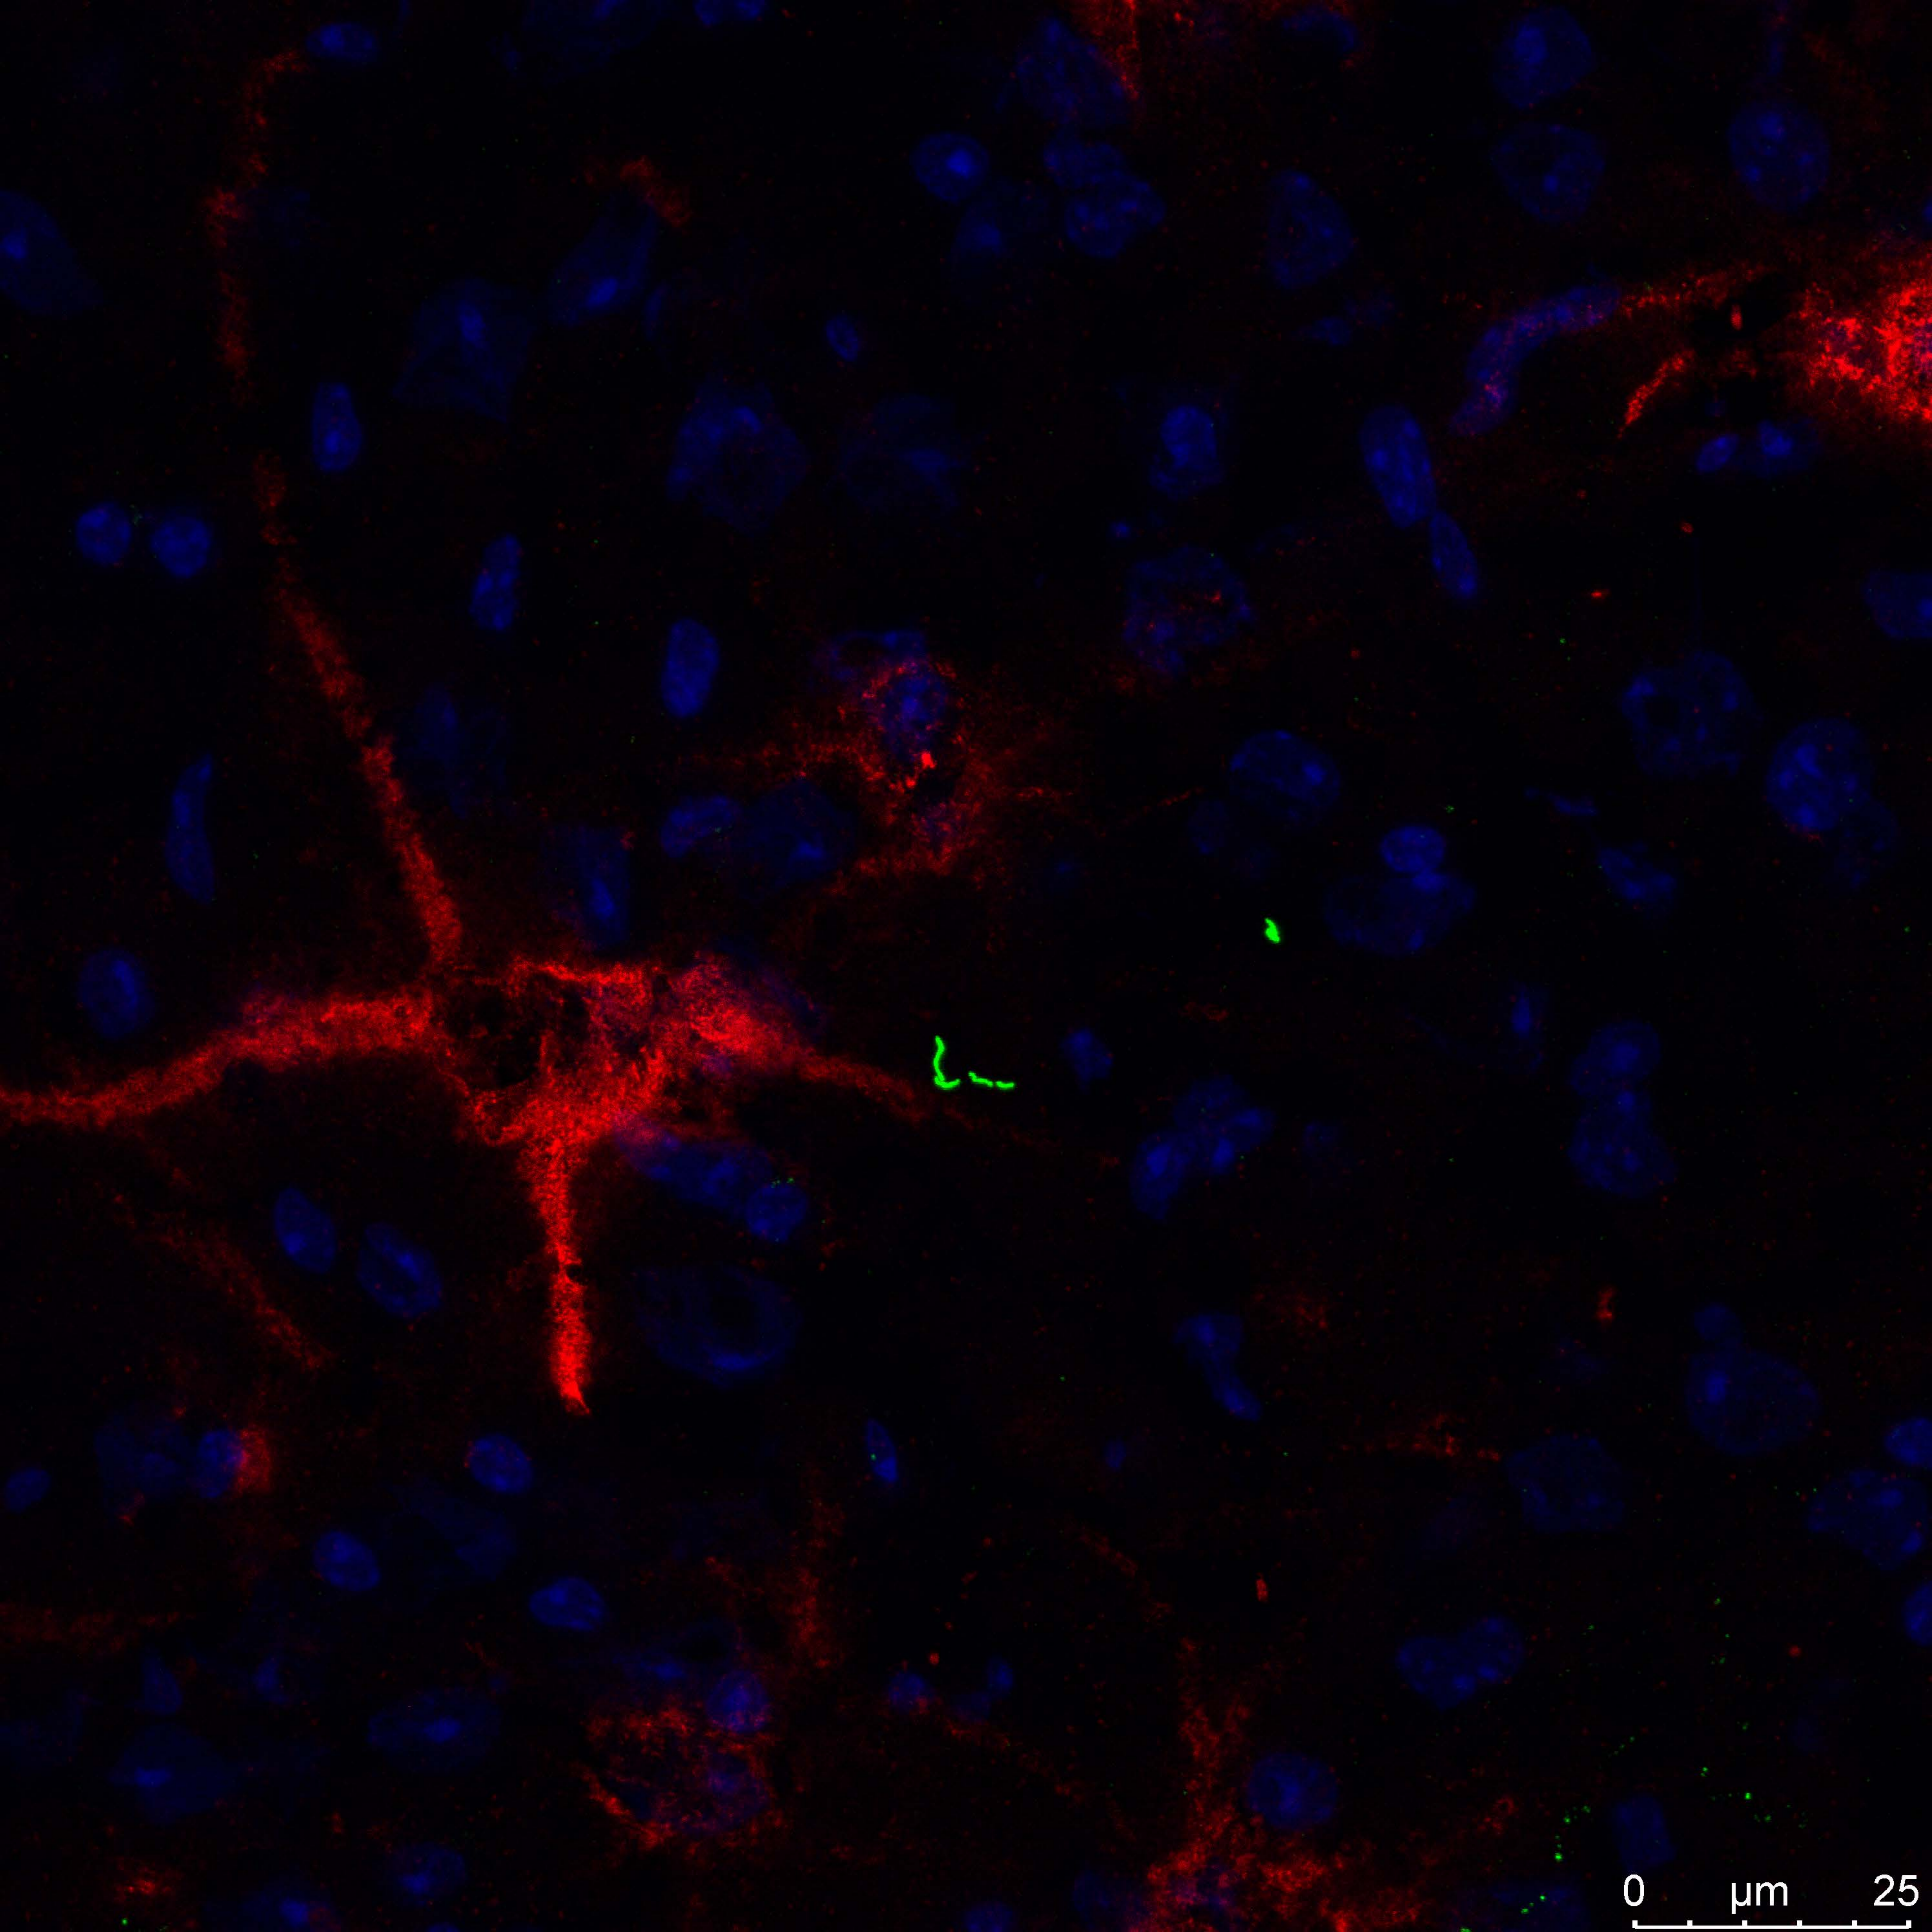

0  $\mu\text{m}$  25



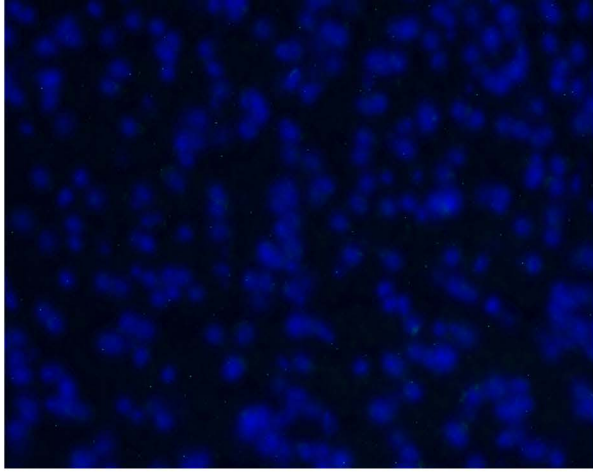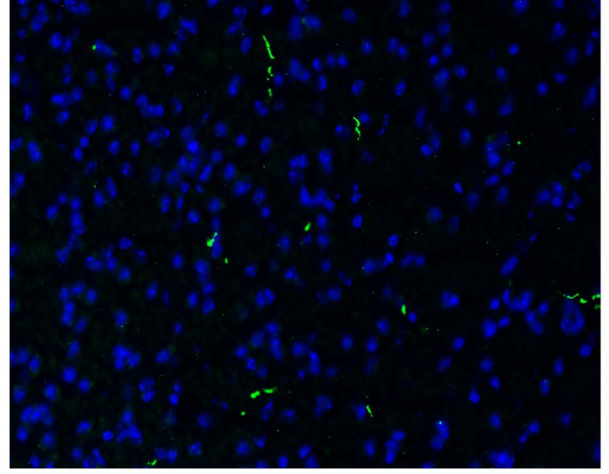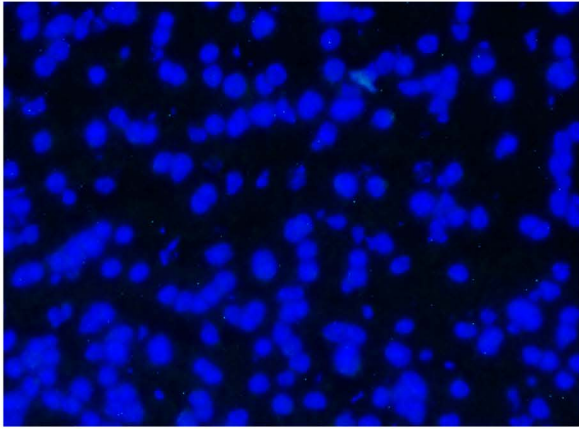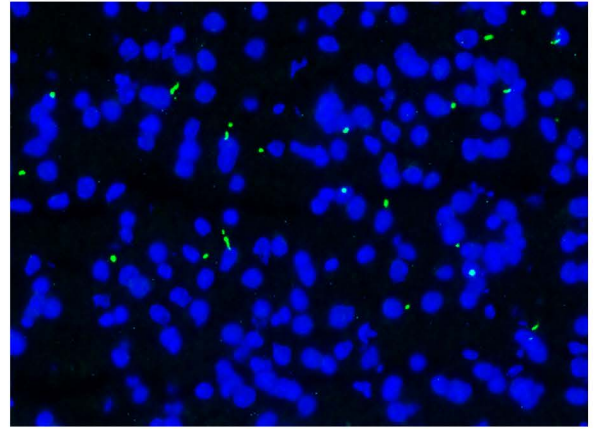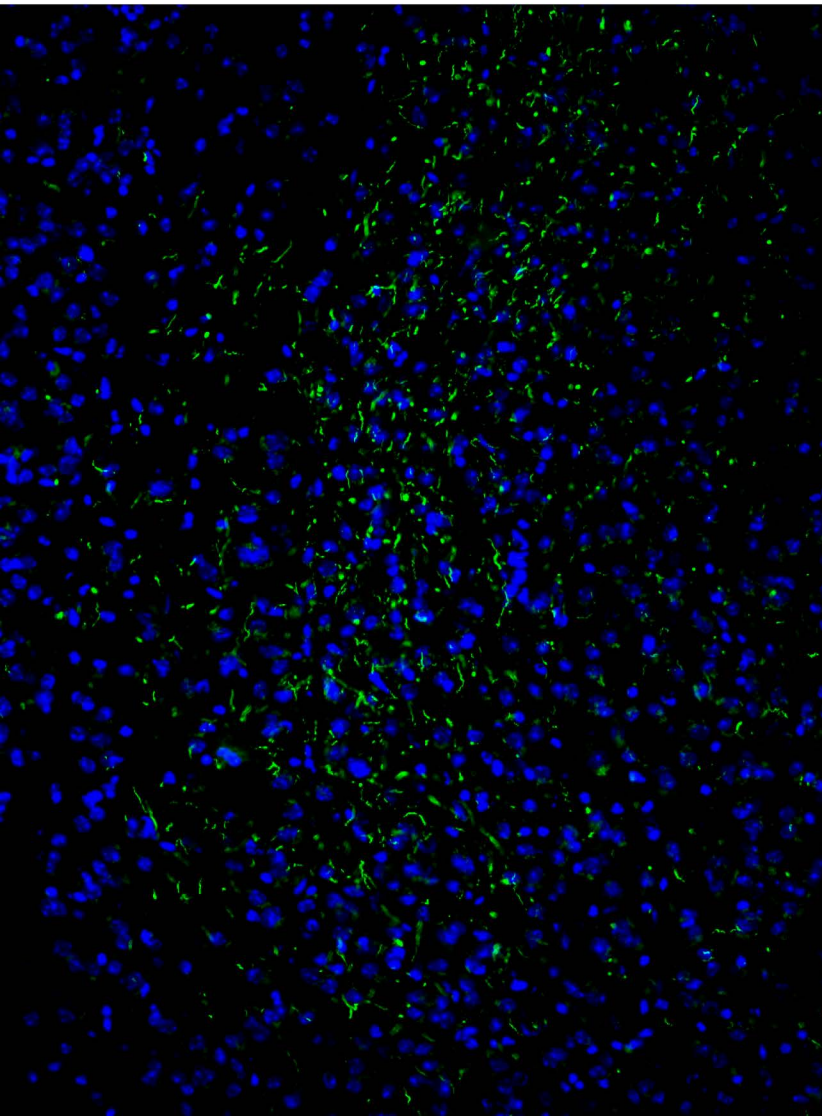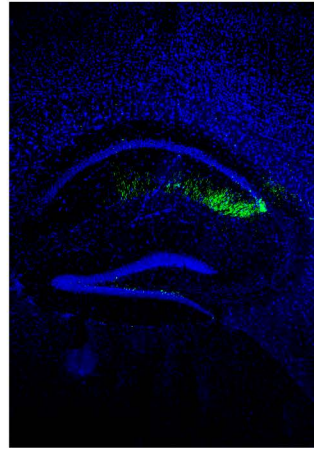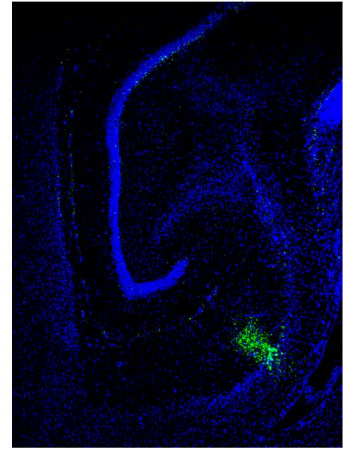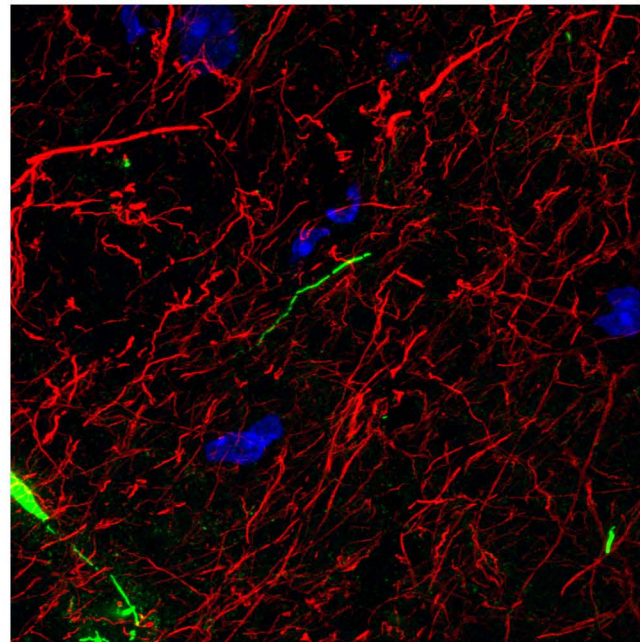



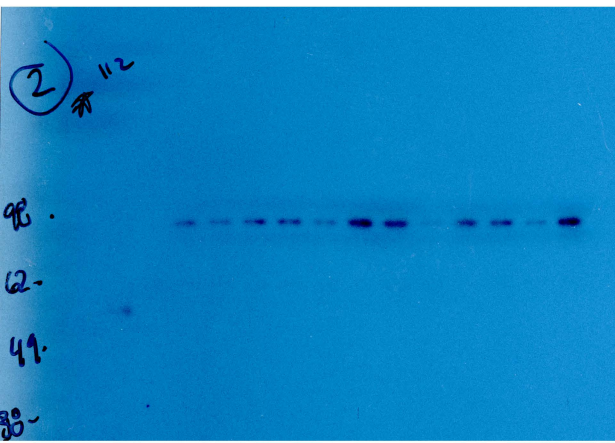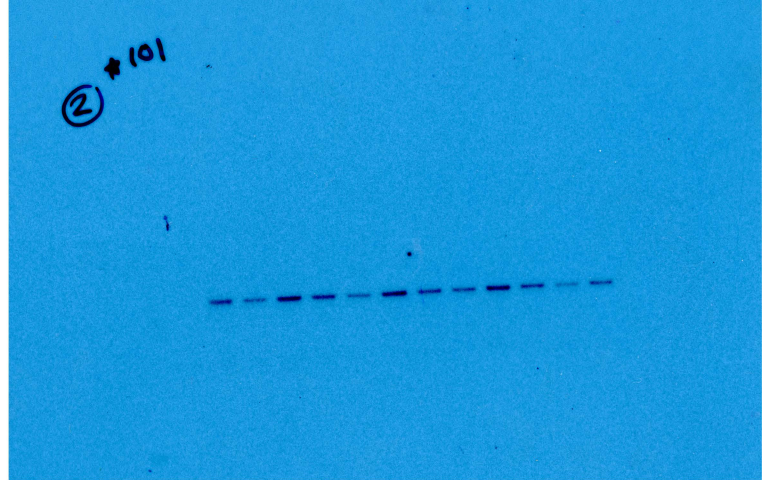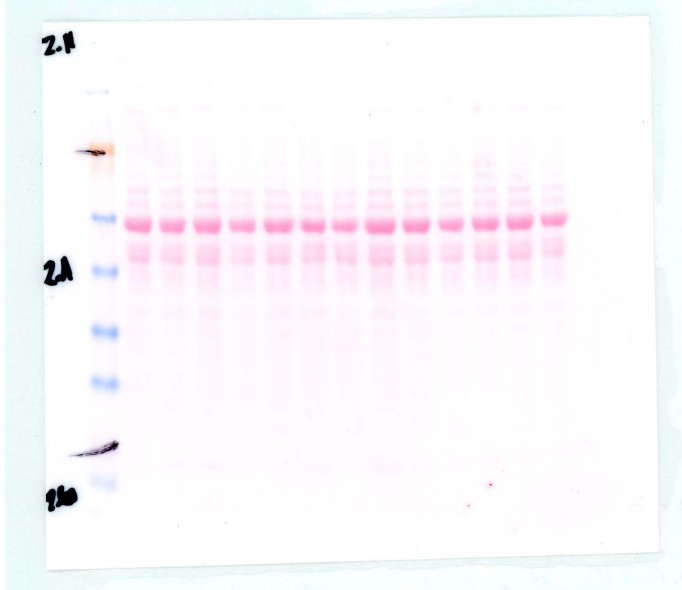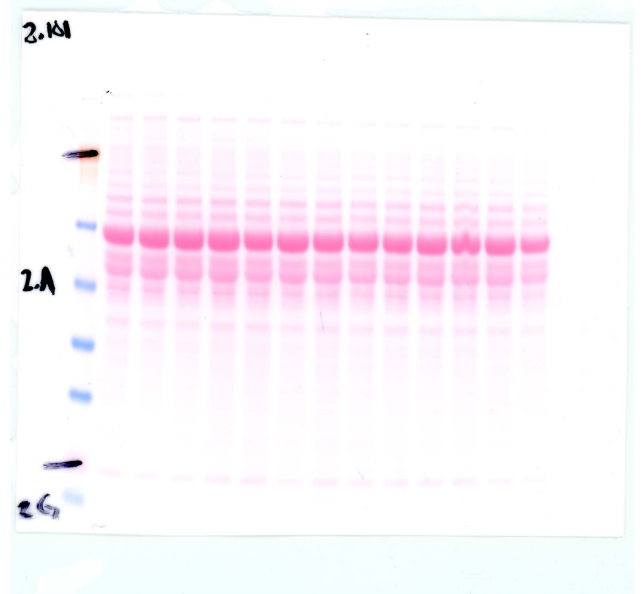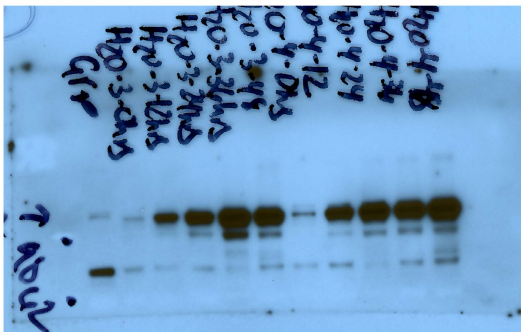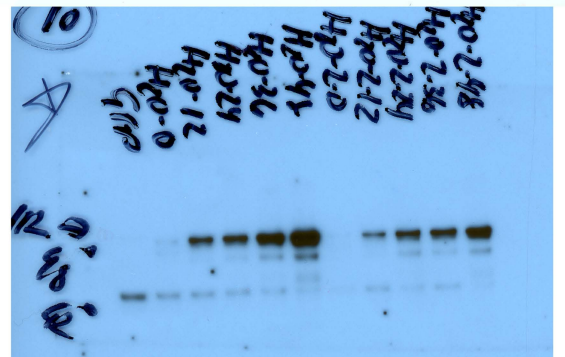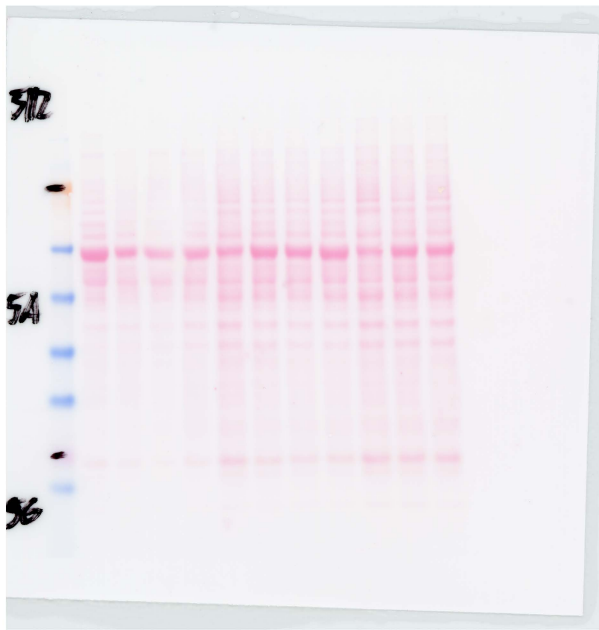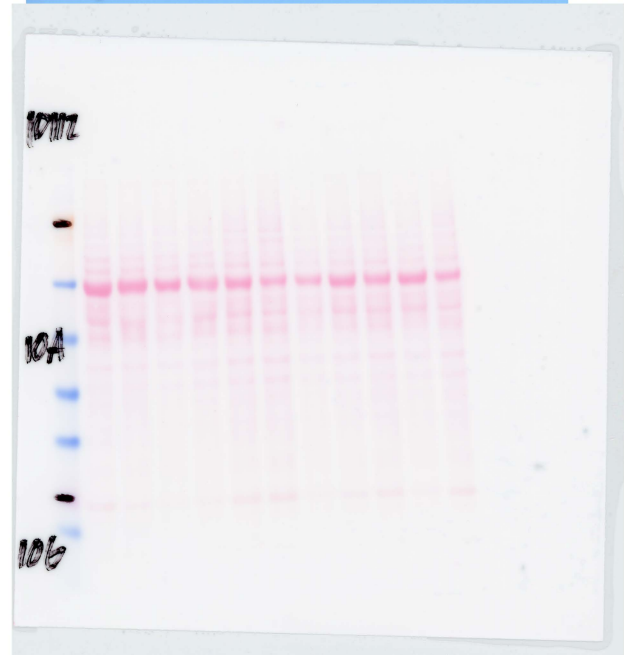



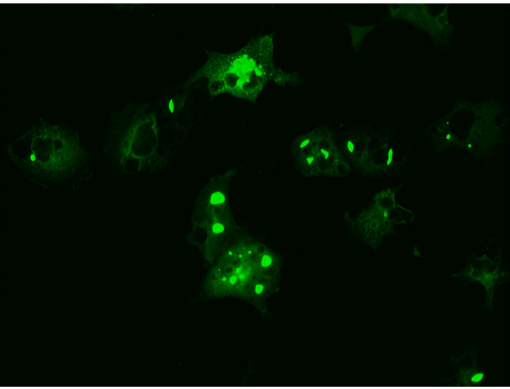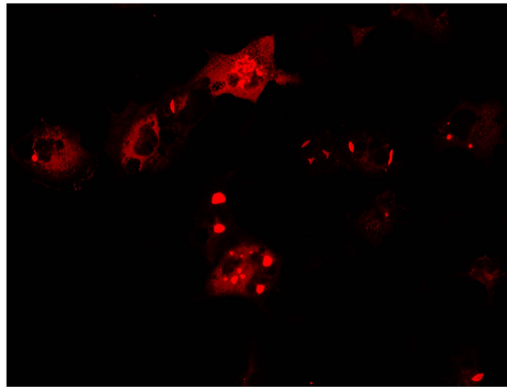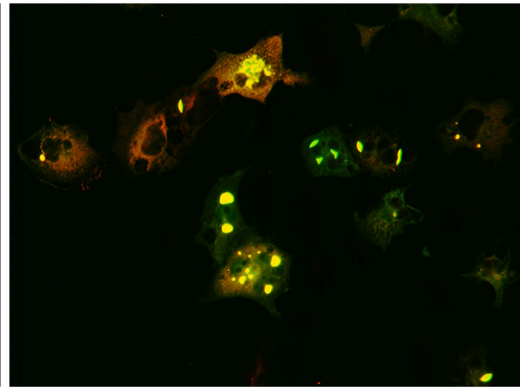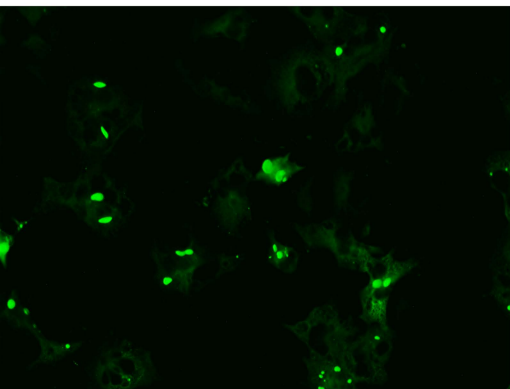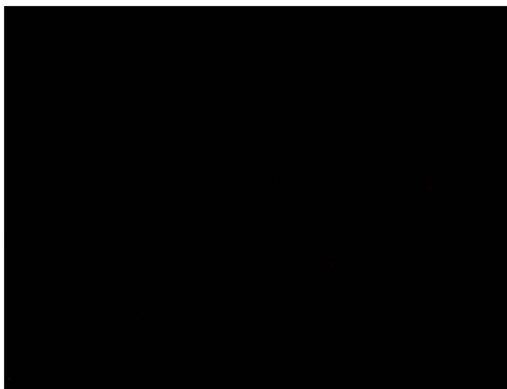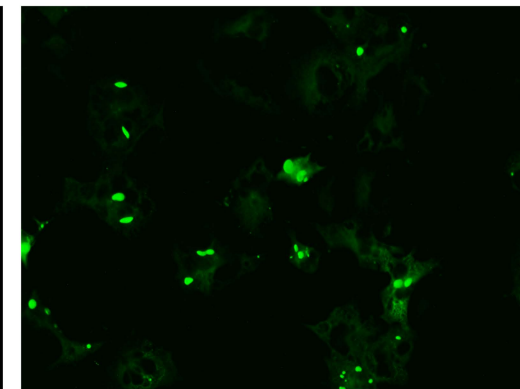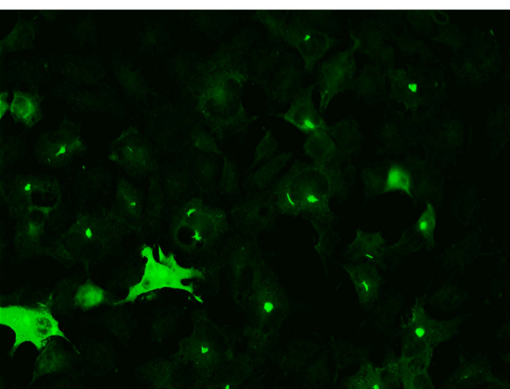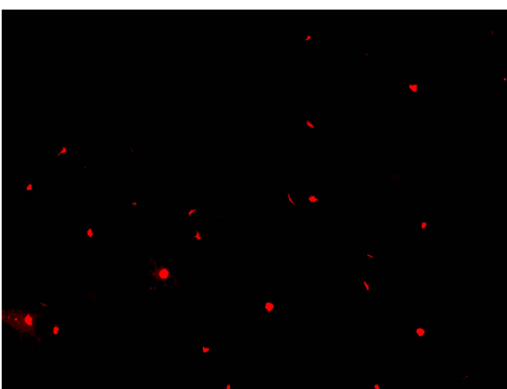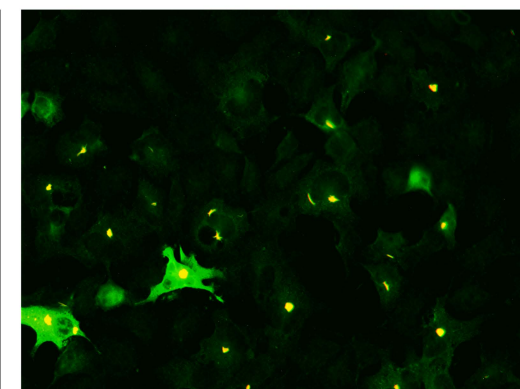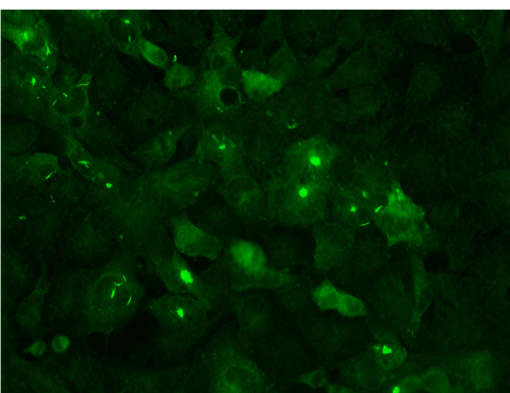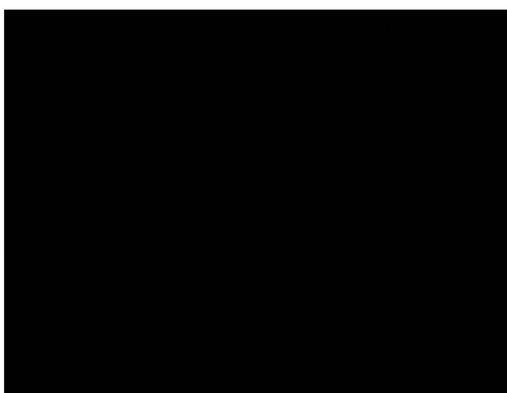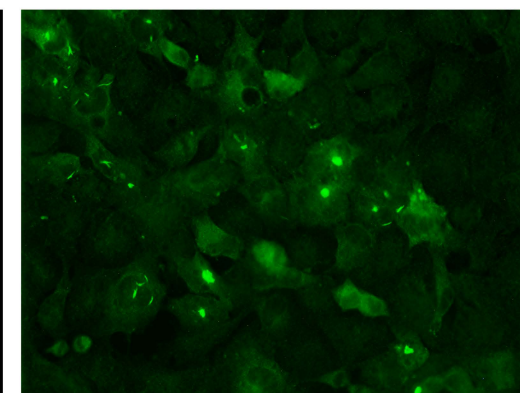







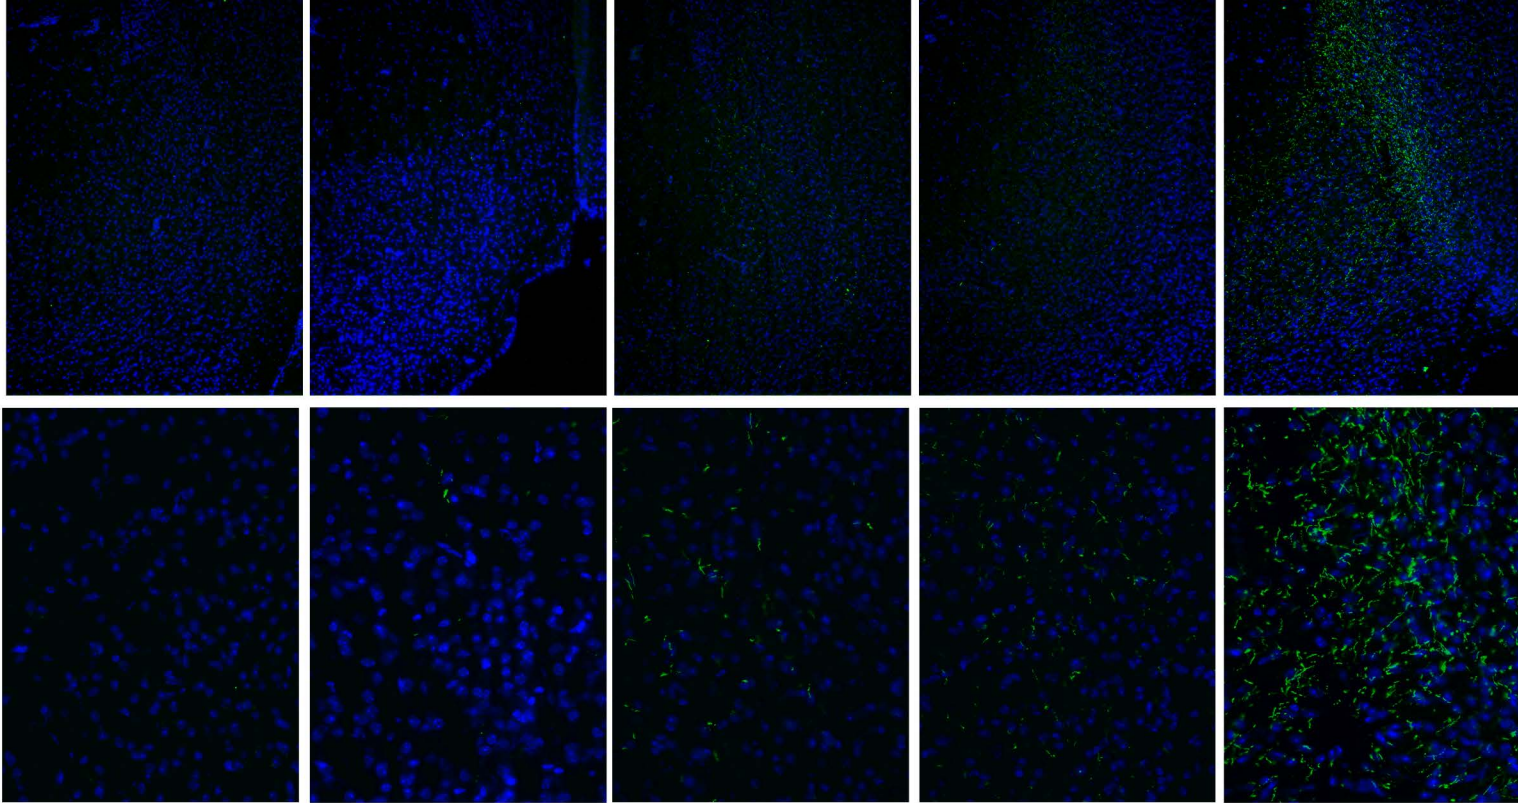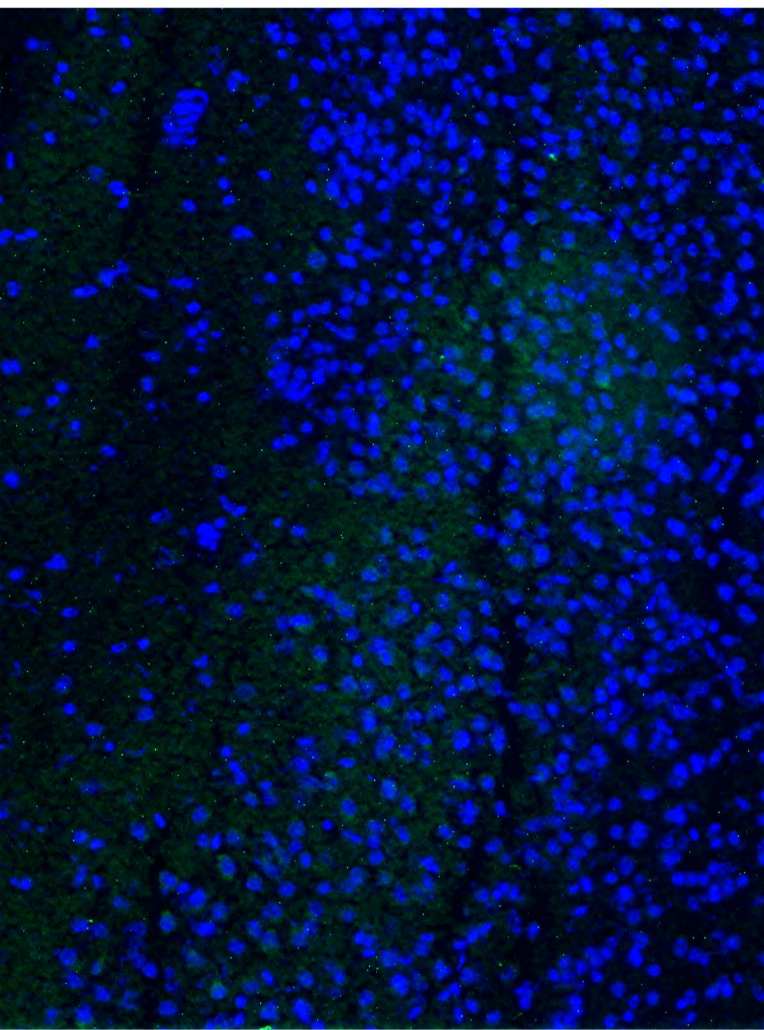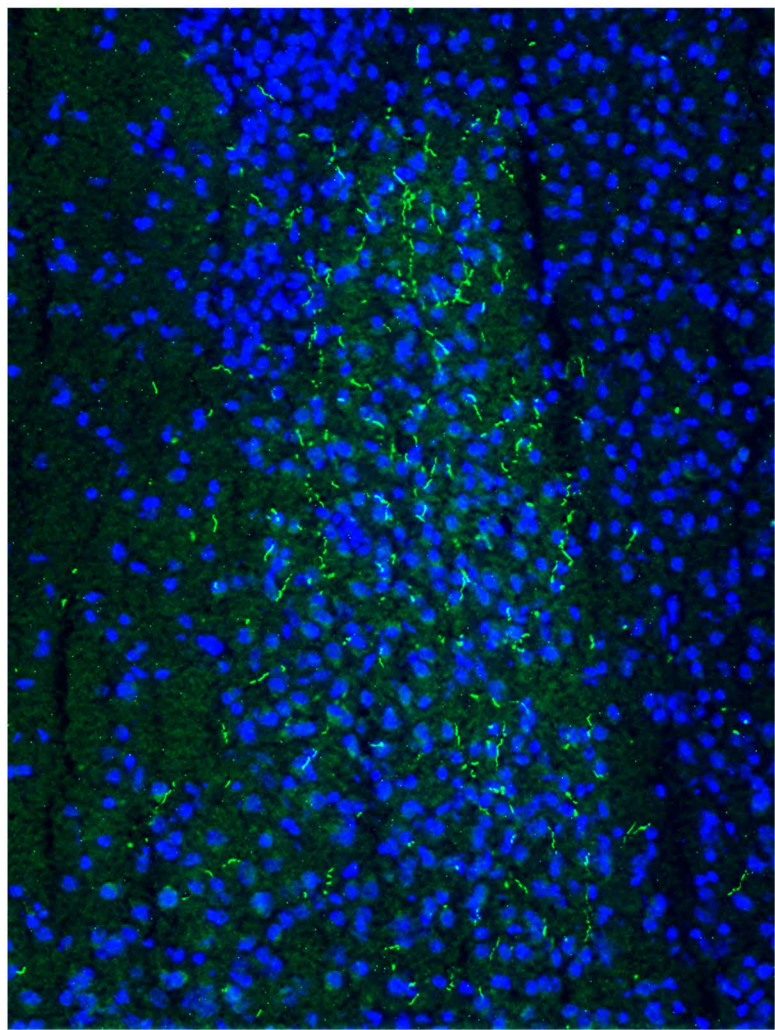



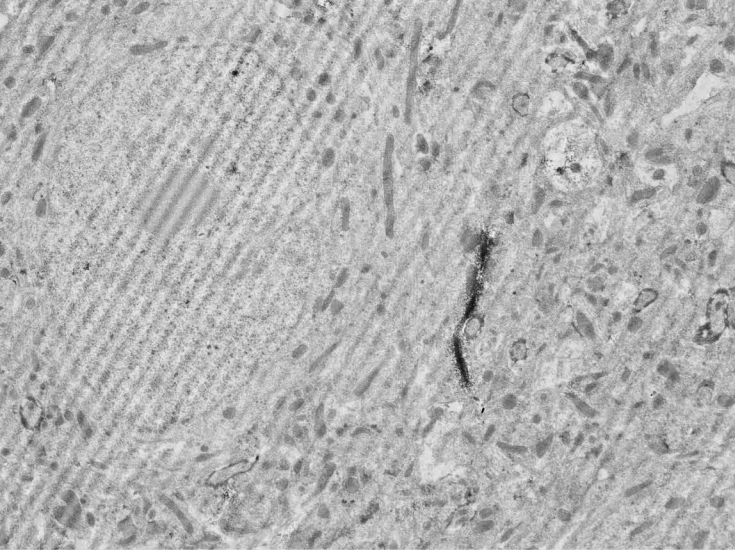

filament1 1500x sxn2  
Print Mag: 8050x @ 7.0 in  
14:27:07 10/3/2018

2 µm  
HV=120.0kV  
Direct Mag: 1500x  
AMT Camera System

Camera: XR81, Exposure(ms): 960 Gain: 1, Bin: 1  
Gamma: 1.00, No Sharpening, Normal Contrast

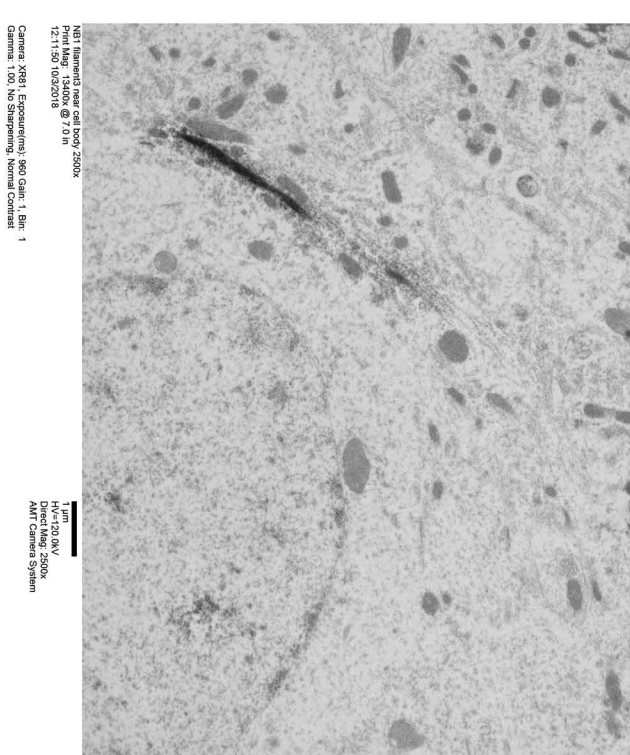

NB1 filament3 near cell body 2500x  
Print Mag: 12150x @ 7.0 in  
12:11:50 10/3/2018

1 µm  
HV=120.0kV  
Direct Mag: 2500x  
AMT Camera System

Camera: XR81, Exposure(ms): 960 Gain: 1, Bin: 1  
Gamma: 1.00, No Sharpening, Normal Contrast

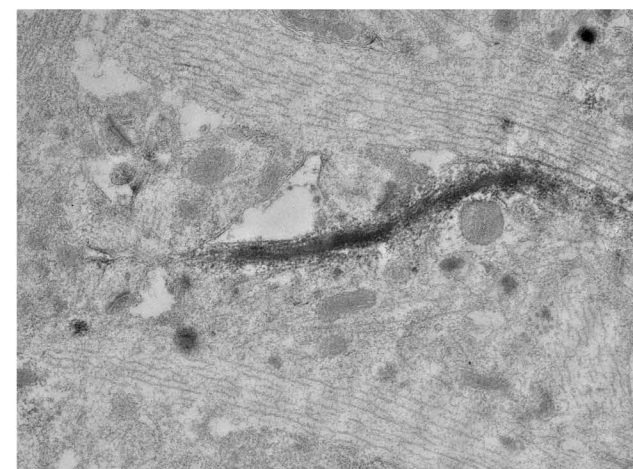

fil next to poss dendrite 5000x  
Print Mag: 26800x @ 7.0 in  
14:42:18 10/3/2018

800 nm  
HV=120.0kV  
Direct Mag: 5000x  
AMT Camera System

Camera: XR81, Exposure(ms): 960 Gain: 1, Bin: 1  
Gamma: 1.00, No Sharpening, Normal Contrast

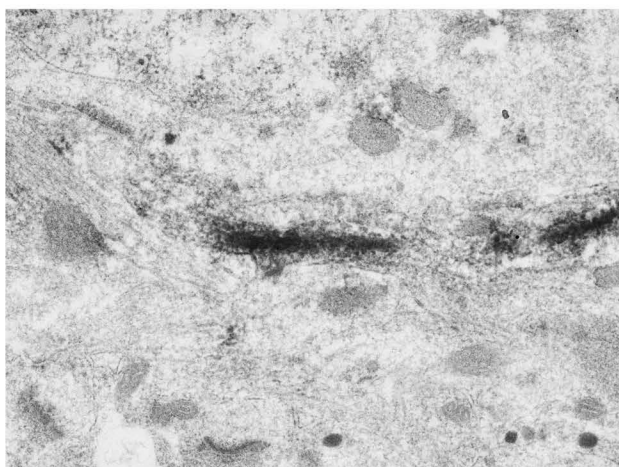

OB82 poss filament 8000x  
Print Mag: 42200x @ 7.0 in  
10:38:09 8/2/2018

500 nm  
HV=120.0kV  
Direct Mag: 8000x  
AMT Camera System

Camera: XR81, Exposure(ms): 960 Gain: 1, Bin: 1  
Gamma: 1.00, No Sharpening, Normal Contrast

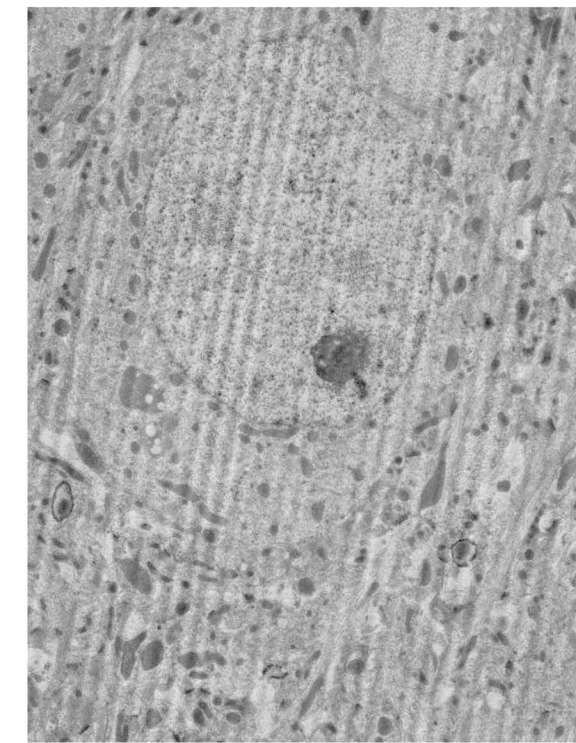

1 µm  
HV=120.0kV  
Direct Mag: 1500x  
AMT Camera System

KO filament near cell body 5000x  
Print Mag: 80200x @ 7.0 in  
13:02:00 08/24/18  
x0051 KO filament near cell body 5000x

Camera: XR81, Exposure(ms): 960 Gain: 1, Bin: 1  
Gamma: 1.00, No Sharpening, Normal Contrast

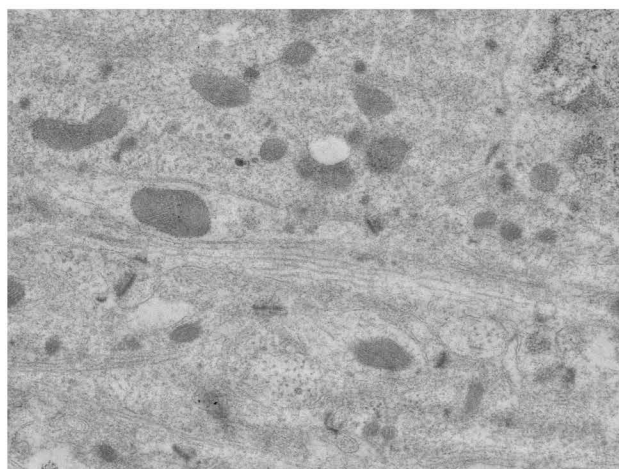

KO unmyelinated axon 2 cell bodies 5000x  
Print Mag: 78900x @ 7.0 in  
13:37:58 10/3/2018

800 nm  
HV=120.0kV  
Direct Mag: 5000x  
AMT Camera System

Camera: XR81, Exposure(ms): 960 Gain: 1, Bin: 1  
Gamma: 1.00, No Sharpening, Normal Contrast



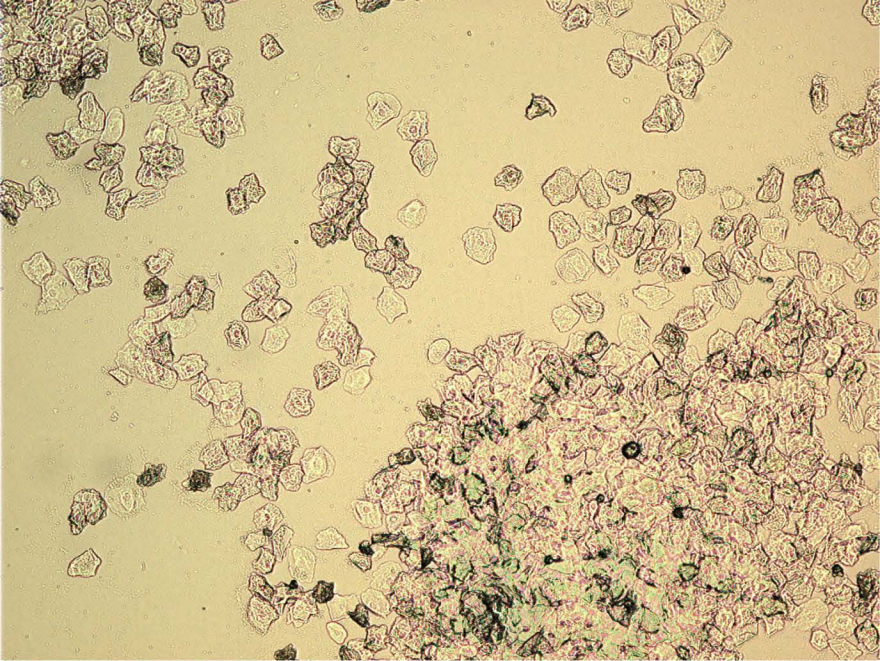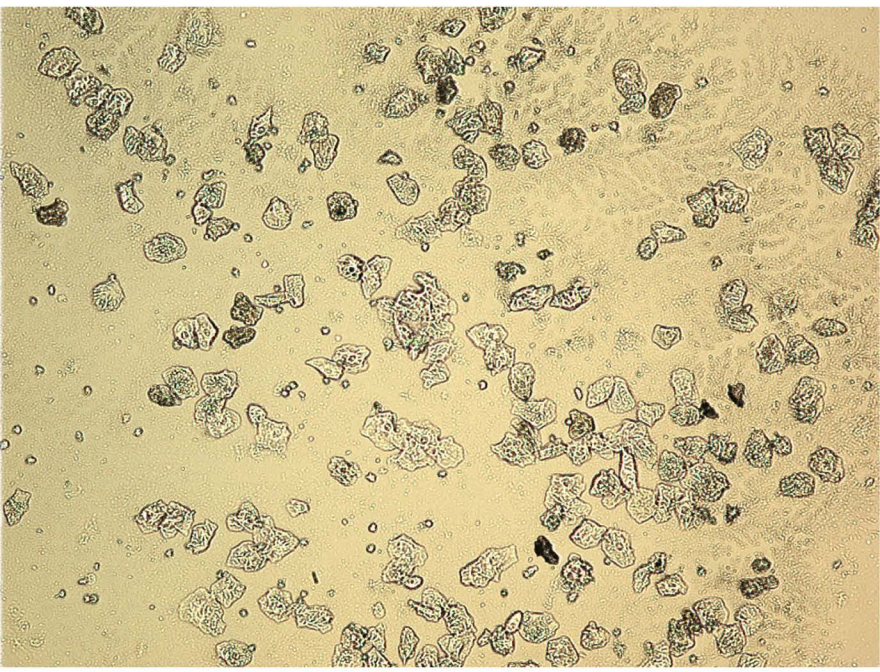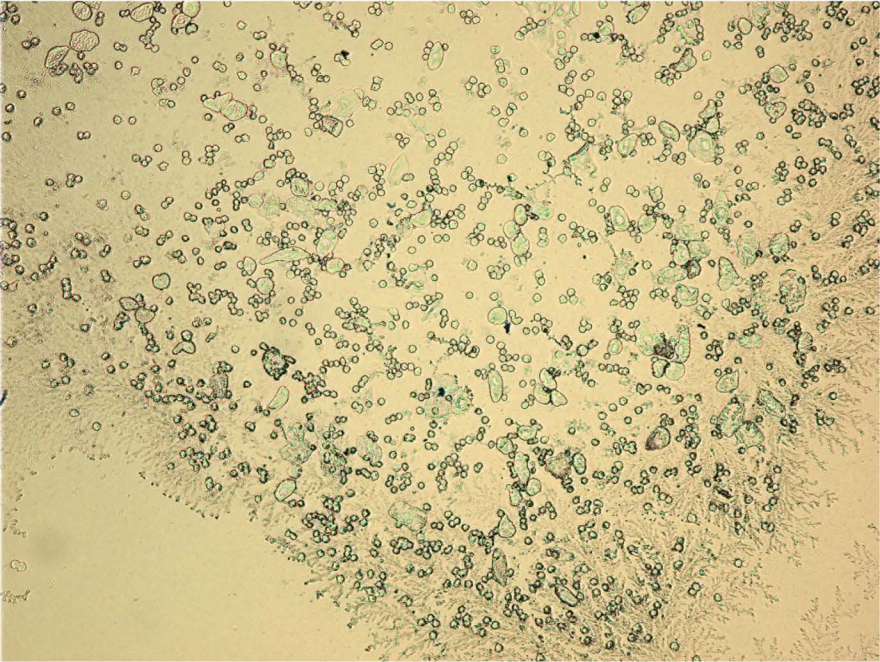



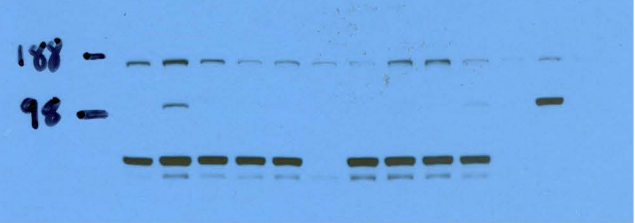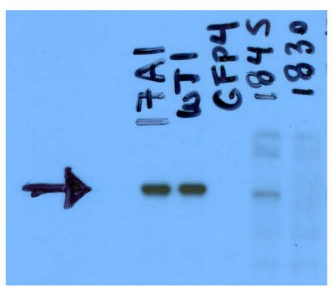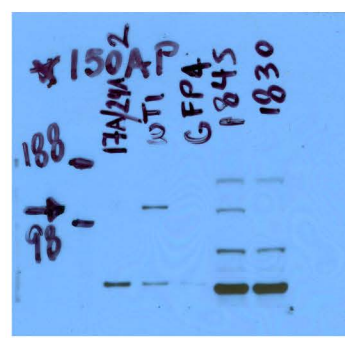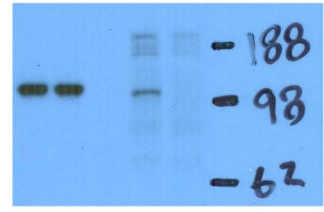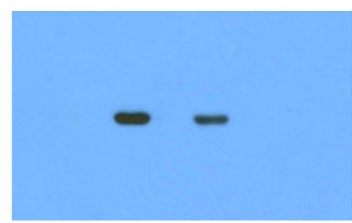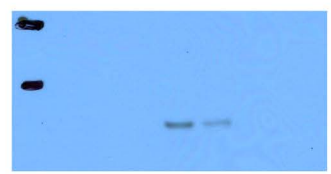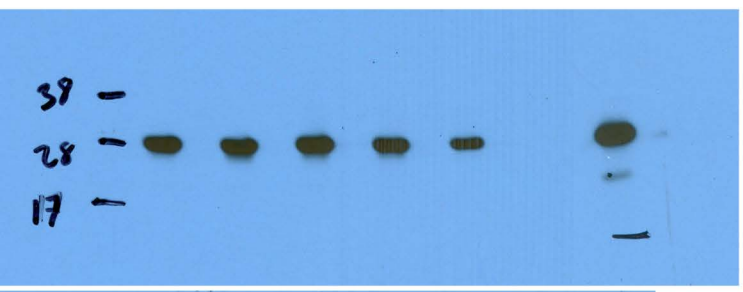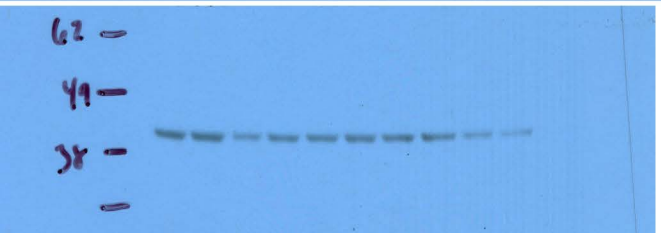



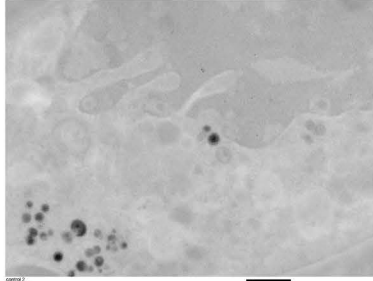

Panel 2  
CPT-4 primary  
12/15/2016  
Prep: JRM  
13.5kV X20000  
Microscopy: JRM  
Camera: V10, Versaruay 800 Giga, 1.8k  
Camera: 1.0k, 30.00um, 30.00um, 30.00um

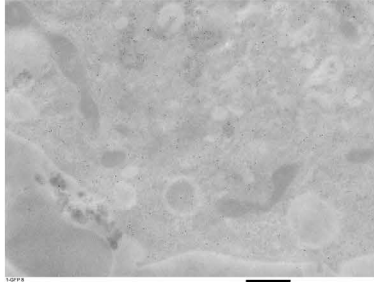

Panel 3  
CPT-4 primary  
12/15/2016  
Prep: JRM  
13.5kV X20000  
Microscopy: JRM  
Camera: V10, Versaruay 800 Giga, 1.8k  
Camera: 1.0k, 30.00um, 30.00um, 30.00um

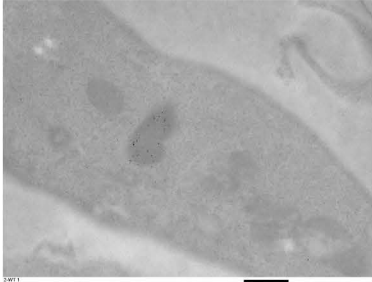

Panel 4  
CPT-4 primary  
12/15/2016  
Prep: JRM  
13.5kV X20000  
Microscopy: JRM  
Camera: V10, Versaruay 800 Giga, 1.8k  
Camera: 1.0k, 30.00um, 30.00um, 30.00um

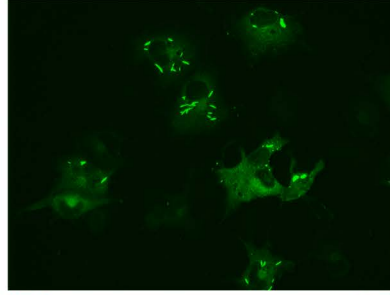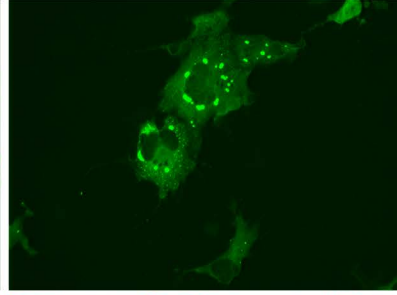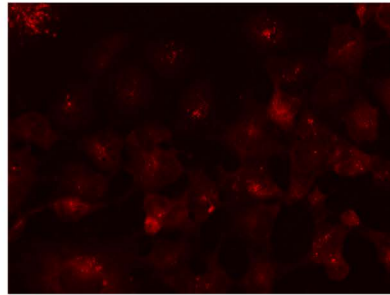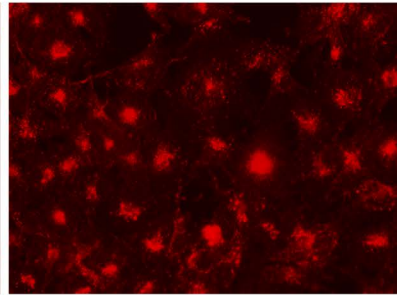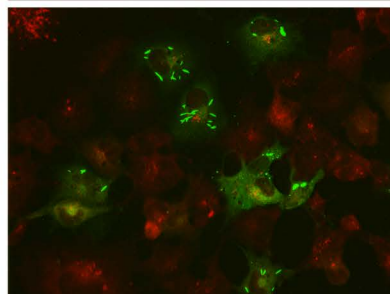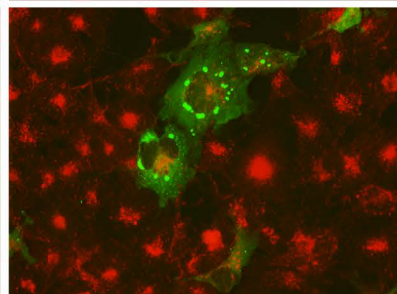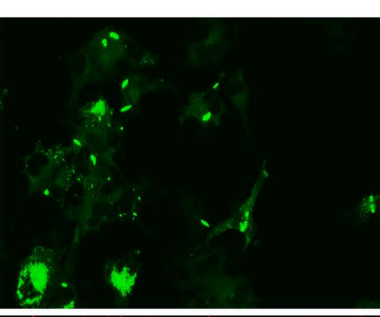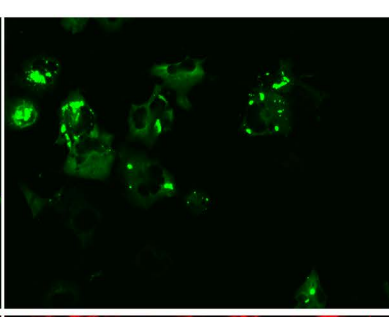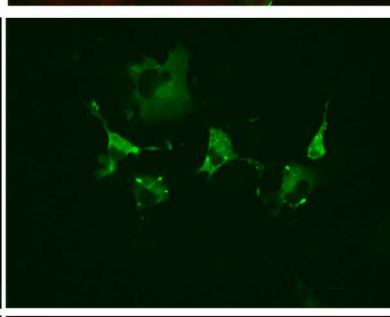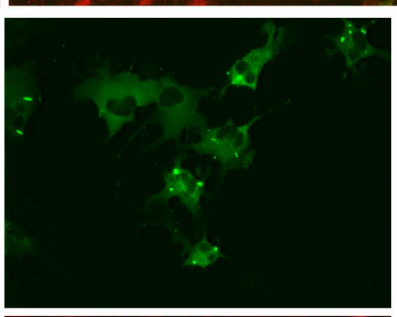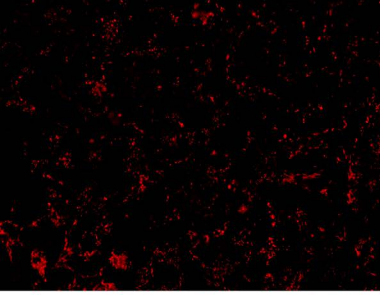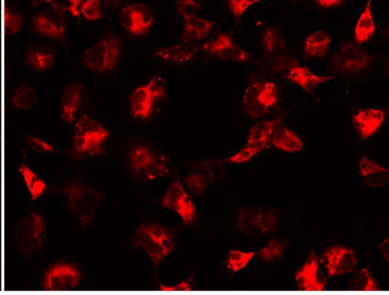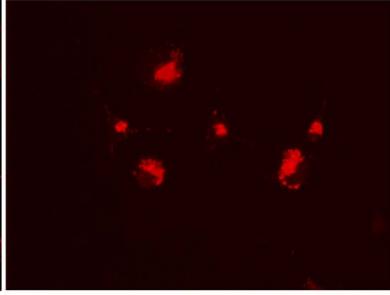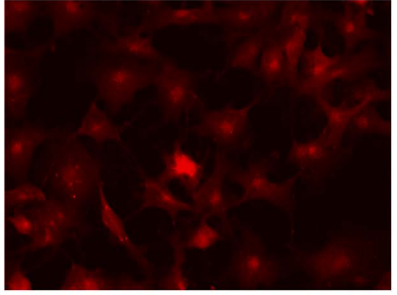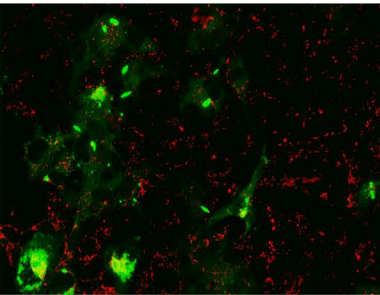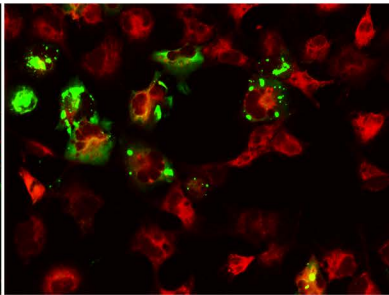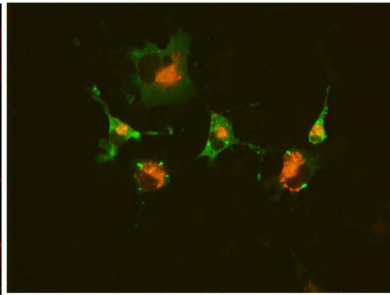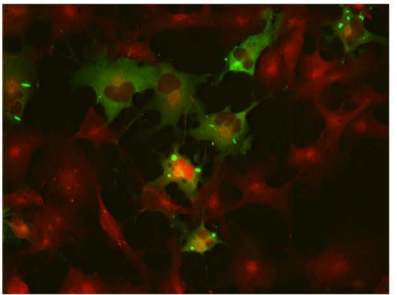

Supplement: ACEL-21-e13687-s005.pdf [file ACEL-21-e13687-s005.pdf]
