# Supplementary material for: Conserved age‐related increases in hippocampal PDE11A4 cause unexpected proteinopathies and cognitive decline of social associative memories
Source: PubMed Central journal article supplement (PMC9577960; doi:10.1111/acel.13687), 2022-09-08
Supplement: ACEL-21-e13687-s004.pdf [file ACEL-21-e13687-s004.pdf]

Table S2. GO Processes Pathways identified as significantly enriched for both mRNA changes and phosphoproteomic changes in VHIPP old *Pde11a* KO vs WT

| #term ID   | term description                               | RNA sequencing pathway   |                           |          |          | Phosphoproteomics pathway |          |        |
|------------|------------------------------------------------|--------------------------|---------------------------|----------|----------|---------------------------|----------|--------|
|            |                                                | background<br>gene count | observed<br>gene<br>count | strength | FDR-P=   | observed<br>gene<br>count | strength | FDR-P= |
| GO:0050896 | response to stimulus                           | 6616                     | 664                       | 0.14     | 7.61E-19 | 17                        | 0.41     | 0.0034 |
| GO:0010243 | response to organonitrogen compound            | 867                      | 105                       | 0.22     | 3.86E-05 | 7                         | 0.91     | 0.0052 |
| GO:0006950 | response to stress                             | 2899                     | 248                       | 0.07     | 0.043    | 11                        | 0.58     | 0.0072 |
| GO:0051049 | regulation of transport                        | 1782                     | 202                       | 0.19     | 9.30E-08 | 9                         | 0.7      | 0.0072 |
| GO:0009987 | cellular process                               | 12459                    | 1138                      | 0.1      | 6.33E-29 | 21                        | 0.23     | 0.0093 |
| GO:0072347 | response to anesthetic                         | 81                       | 14                        | 0.38     | 0.0441   | 3                         | 1.57     | 0.01   |
| GO:0010035 | response to inorganic substance                | 505                      | 61                        | 0.22     | 0.0035   | 5                         | 1        | 0.0118 |
| GO:0043279 | response to alkaloid                           | 115                      | 18                        | 0.33     | 0.0376   | 3                         | 1.42     | 0.0182 |
| GO:0007268 | chemical synaptic transmission                 | 321                      | 55                        | 0.37     | 2.54E-06 | 4                         | 1.1      | 0.0183 |
| GO:0010038 | response to metal ion                          | 344                      | 42                        | 0.23     | 0.0193   | 4                         | 1.07     | 0.0183 |
| GO:0032501 | multicellular organismal process               | 5888                     | 643                       | 0.18     | 6.03E-27 | 14                        | 0.38     | 0.0183 |
| GO:0042493 | response to drug                               | 926                      | 114                       | 0.23     | 8.11E-06 | 6                         | 0.81     | 0.0183 |
| GO:0051128 | regulation of cellular component organization  | 2337                     | 272                       | 0.21     | 7.00E-12 | 9                         | 0.59     | 0.0183 |
| GO:0060284 | regulation of cell development                 | 992                      | 157                       | 0.34     | 1.86E-15 | 6                         | 0.78     | 0.0183 |
| GO:0060359 | response to ammonium ion                       | 122                      | 19                        | 0.33     | 0.0326   | 3                         | 1.39     | 0.0183 |
| GO:0045664 | regulation of neuron differentiation           | 714                      | 117                       | 0.35     | 2.71E-12 | 5                         | 0.85     | 0.0214 |
| GO:0007399 | nervous system development                     | 2181                     | 334                       | 0.33     | 4.19E-32 | 8                         | 0.57     | 0.0273 |
| GO:0051239 | regulation of multicellular organismal process | 2858                     | 343                       | 0.22     | 3.32E-17 | 9                         | 0.5      | 0.03   |
| GO:0042221 | response to chemical                           | 3532                     | 364                       | 0.15     | 7.51E-10 | 10                        | 0.45     | 0.0309 |
| GO:0045595 | regulation of cell differentiation             | 1751                     | 229                       | 0.26     | 2.18E-14 | 7                         | 0.6      | 0.0318 |
| GO:0006816 | calcium ion transport                          | 228                      | 32                        | 0.29     | 0.0105   | 3                         | 1.12     | 0.0367 |
| GO:0010975 | regulation of neuron projection development    | 547                      | 101                       | 0.41     | 3.13E-13 | 4                         | 0.87     | 0.0448 |
| GO:0006810 | transport                                      | 3187                     | 316                       | 0.14     | 8.43E-07 | 9                         | 0.45     | 0.0473 |
| GO:0010033 | response to organic substance                  | 2553                     | 267                       | 0.16     | 2.00E-07 | 8                         | 0.5      | 0.0473 |
| GO:1901700 | response to oxygen-containing compound         | 1429                     | 170                       | 0.22     | 9.89E-08 | 6                         | 0.62     | 0.0473 |
| GO:0014015 | positive regulation of gliogenesis             | 73                       | 15                        | 0.45     | 0.0107   | 2                         | 1.44     | 0.0496 |
| GO:0042981 | regulation of apoptotic process                | 1476                     | 146                       | 0.14     | 0.0034   | 6                         | 0.61     | 0.0496 |
| GO:0051050 | positive regulation of transport               | 987                      | 101                       | 0.15     | 0.0098   | 5                         | 0.71     | 0.0496 |

sorted by phosphoproteomic FDR-P value
