# Supplementary material for: Conserved age‐related increases in hippocampal PDE11A4 cause unexpected proteinopathies and cognitive decline of social associative memories
Source: PubMed Central journal article supplement (PMC9577960; doi:10.1111/acel.13687), 2022-09-08
Supplement: ACEL-21-e13687-s008.pdf [file ACEL-21-e13687-s008.pdf]

Table S3. GO Component Pathways identified as significantly enriched for both mRNA changes and phosphoproteomic changes in VHIPP old *Pde11a* KO vs WT mice.

| #term ID   | term description                             | RNA sequencing pathway   |               |          |          | Phosphoproteomics pathway |          |          |
|------------|----------------------------------------------|--------------------------|---------------|----------|----------|---------------------------|----------|----------|
|            |                                              | background<br>gene count | observed      |          | FDR-P=   | observed<br>gene<br>count | strength | FDR-P=   |
|            |                                              |                          | gene<br>count | strength |          |                           |          |          |
| GO:0120025 | plasma membrane bounded cell projection      | 2172                     | 273           | 0.24     | 1.22E-15 | 12                        | 0.74     | 2.11E-05 |
| GO:0043005 | neuron projection                            | 1429                     | 207           | 0.3      | 4.05E-17 | 10                        | 0.85     | 2.11E-05 |
| GO:0005737 | cytoplasm                                    | 9909                     | 858           | 0.08     | 3.08E-10 | 21                        | 0.33     | 2.54E-05 |
| GO:0008021 | synaptic vesicle                             | 183                      | 24            | 0.26     | 0.0465   | 5                         | 1.44     | 3.27E-05 |
| GO:0045202 | synapse                                      | 968                      | 150           | 0.33     | 2.44E-14 | 8                         | 0.92     | 6.43E-05 |
| GO:0005622 | intracellular                                | 12462                    | 1099          | 0.09     | 6.33E-20 | 22                        | 0.25     | 7.08E-05 |
| GO:0030425 | dendrite                                     | 694                      | 117           | 0.37     | 2.56E-13 | 7                         | 1        | 7.08E-05 |
| GO:0098793 | presynapse                                   | 429                      | 60            | 0.29     | 9.86E-05 | 6                         | 1.15     | 7.08E-05 |
| GO:0032991 | protein-containing complex                   | 4701                     | 479           | 0.15     | 2.56E-13 | 14                        | 0.47     | 0.00023  |
| GO:0005829 | cytosol                                      | 3326                     | 283           | 0.07     | 0.0249   | 12                        | 0.56     | 0.00023  |
| GO:0098796 | membrane protein complex                     | 1009                     | 119           | 0.21     | 1.56E-05 | 7                         | 0.84     | 0.00035  |
| GO:0005623 | cell                                         | 14044                    | 1233          | 0.08     | 1.32E-26 | 22                        | 0.2      | 0.00041  |
| GO:0030424 | axon                                         | 712                      | 123           | 0.38     | 1.48E-14 | 6                         | 0.93     | 0.00044  |
| GO:0043232 | intracellular non-membrane-bounded organelle | 3809                     | 352           | 0.11     | 3.01E-05 | 12                        | 0.5      | 0.00062  |
| GO:0099512 | supramolecular fiber                         | 809                      | 96            | 0.21     | 0.00012  | 6                         | 0.87     | 0.00079  |
| GO:0030018 | Z disc                                       | 127                      | 23            | 0.4      | 0.0022   | 3                         | 1.37     | 0.0016   |
| GO:0043226 | organelle                                    | 10897                    | 933           | 0.07     | 9.82E-11 | 19                        | 0.24     | 0.0019   |
| GO:0042383 | sarcolemma                                   | 147                      | 31            | 0.46     | 2.11E-05 | 3                         | 1.31     | 0.0022   |
| GO:0044297 | cell body                                    | 776                      | 111           | 0.3      | 6.54E-09 | 5                         | 0.81     | 0.0043   |
| GO:1902494 | catalytic complex                            | 1266                     | 131           | 0.15     | 0.00094  | 6                         | 0.68     | 0.0046   |
| GO:0043229 | intracellular organelle                      | 10645                    | 907           | 0.07     | 1.19E-09 | 18                        | 0.23     | 0.0049   |
| GO:0005886 | plasma membrane                              | 4328                     | 480           | 0.19     | 1.98E-19 | 11                        | 0.41     | 0.005    |
| GO:0031982 | vesicle                                      | 1837                     | 185           | 0.14     | 0.00016  | 7                         | 0.58     | 0.0054   |
| GO:0031410 | cytoplasmic vesicle                          | 1710                     | 173           | 0.15     | 0.00023  | 6                         | 0.55     | 0.016    |
| GO:0043227 | membrane-bounded organelle                   | 9775                     | 822           | 0.06     | 5.17E-07 | 16                        | 0.21     | 0.0182   |
| GO:0005911 | cell-cell junction                           | 417                      | 53            | 0.24     | 0.0021   | 3                         | 0.86     | 0.0214   |
| GO:0043231 | intracellular membrane-bounded organelle     | 9088                     | 751           | 0.06     | 6.42E-05 | 15                        | 0.22     | 0.0257   |
| GO:0043204 | perikaryon                                   | 170                      | 25            | 0.31     | 0.0138   | 2                         | 1.07     | 0.0318   |
